# Supplementary material for: Synthesis and Biological Studies on (KLAKLAK)2-NH2 Analog Containing Unnatural Amino Acid β-Ala and Conjugates with Second Pharmacophore
Source: MDPI journal article supplement (doi:10.3390/molecules26237321), 2021-12-02

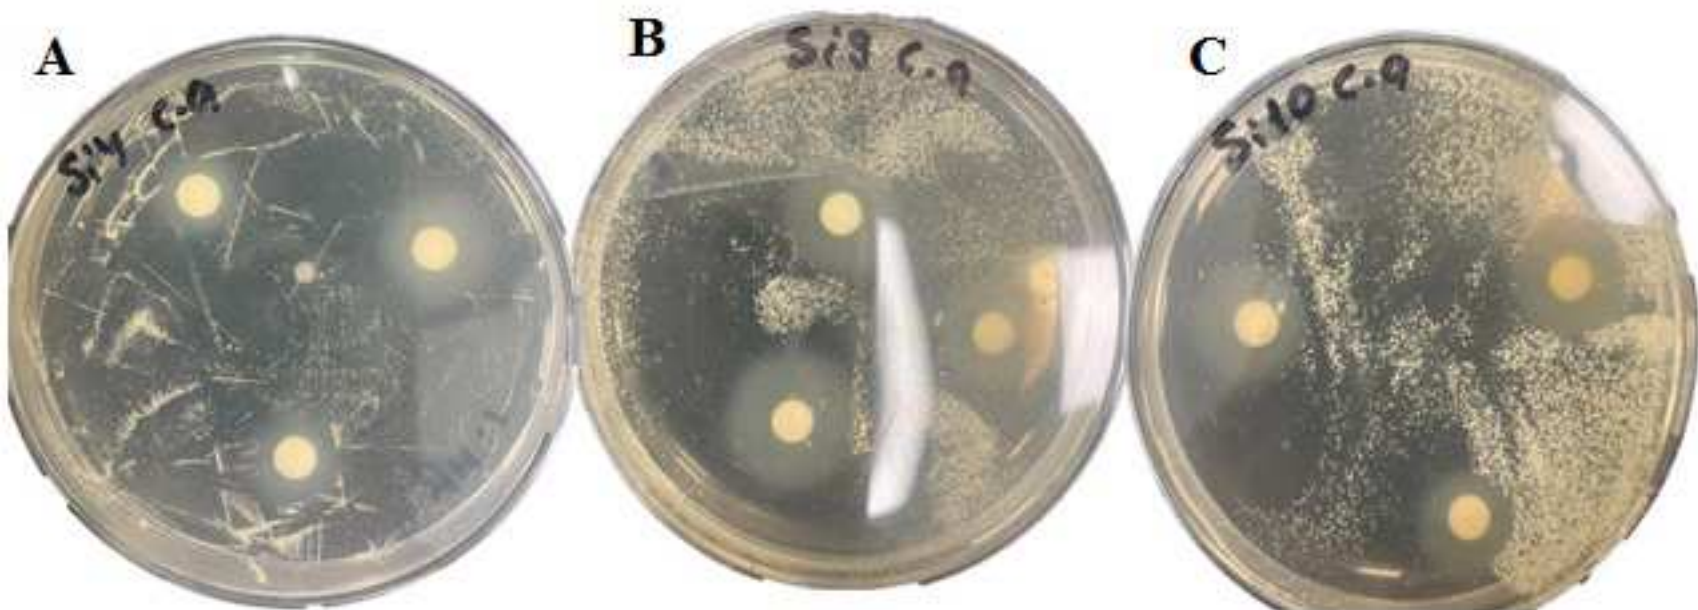

Antimicrobial activity expressed as inhibition zones size (mm) against *Candida albicans* 74 for compounds Si4 (A), Si9 (B), Si10 (C).

MS Chromatogram  
Peptidi Si4.lcd

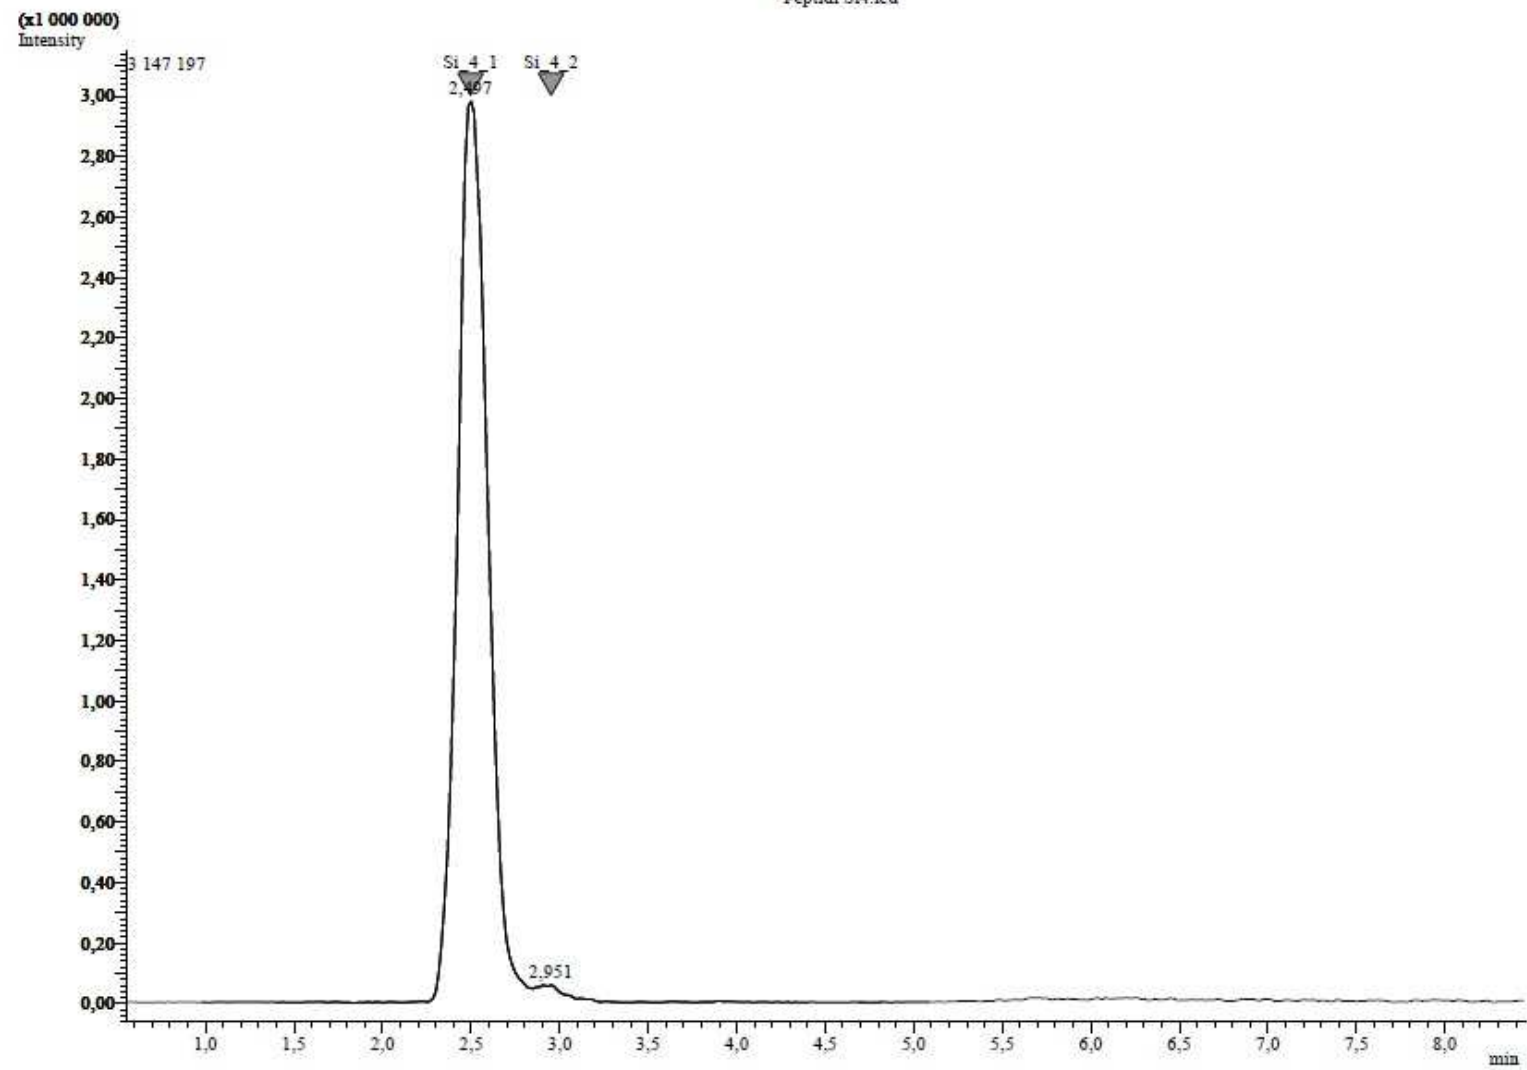

C:\LabSolutions\Data\Data\Peptidi\19062019\Si4.lcd

MS Spectrum

Peak#:1 R.Time:2.497

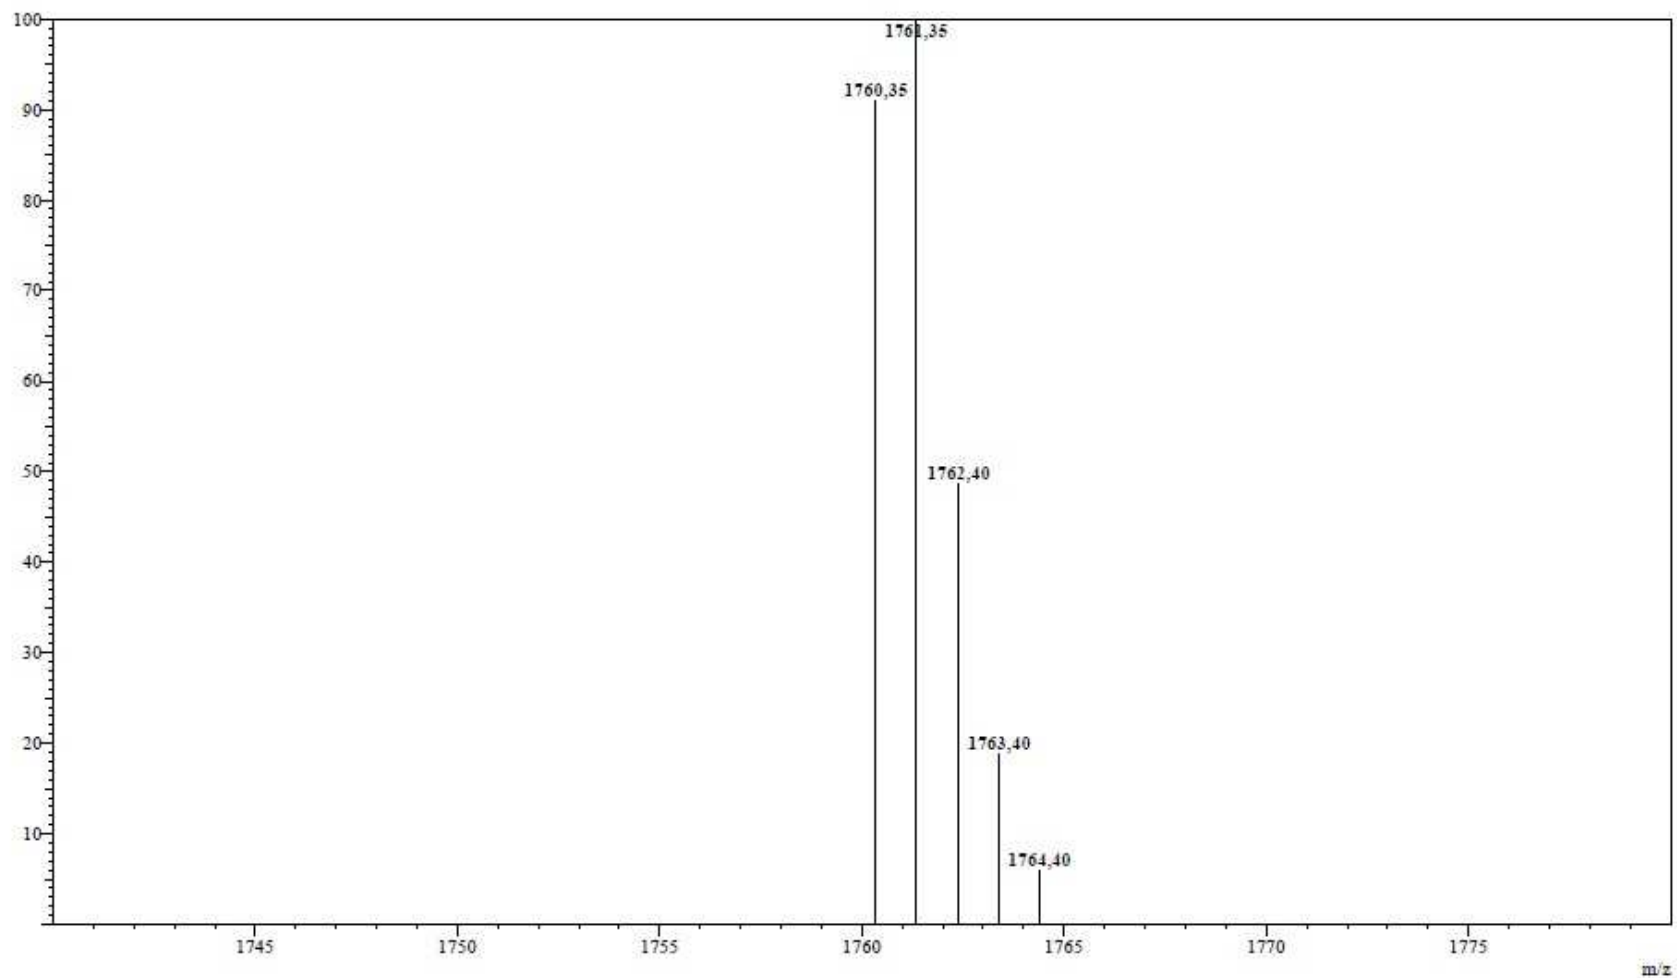

C:\LabSolutions\Data\Data\Peptidi\19062019\Si4.lcd

Si 5"

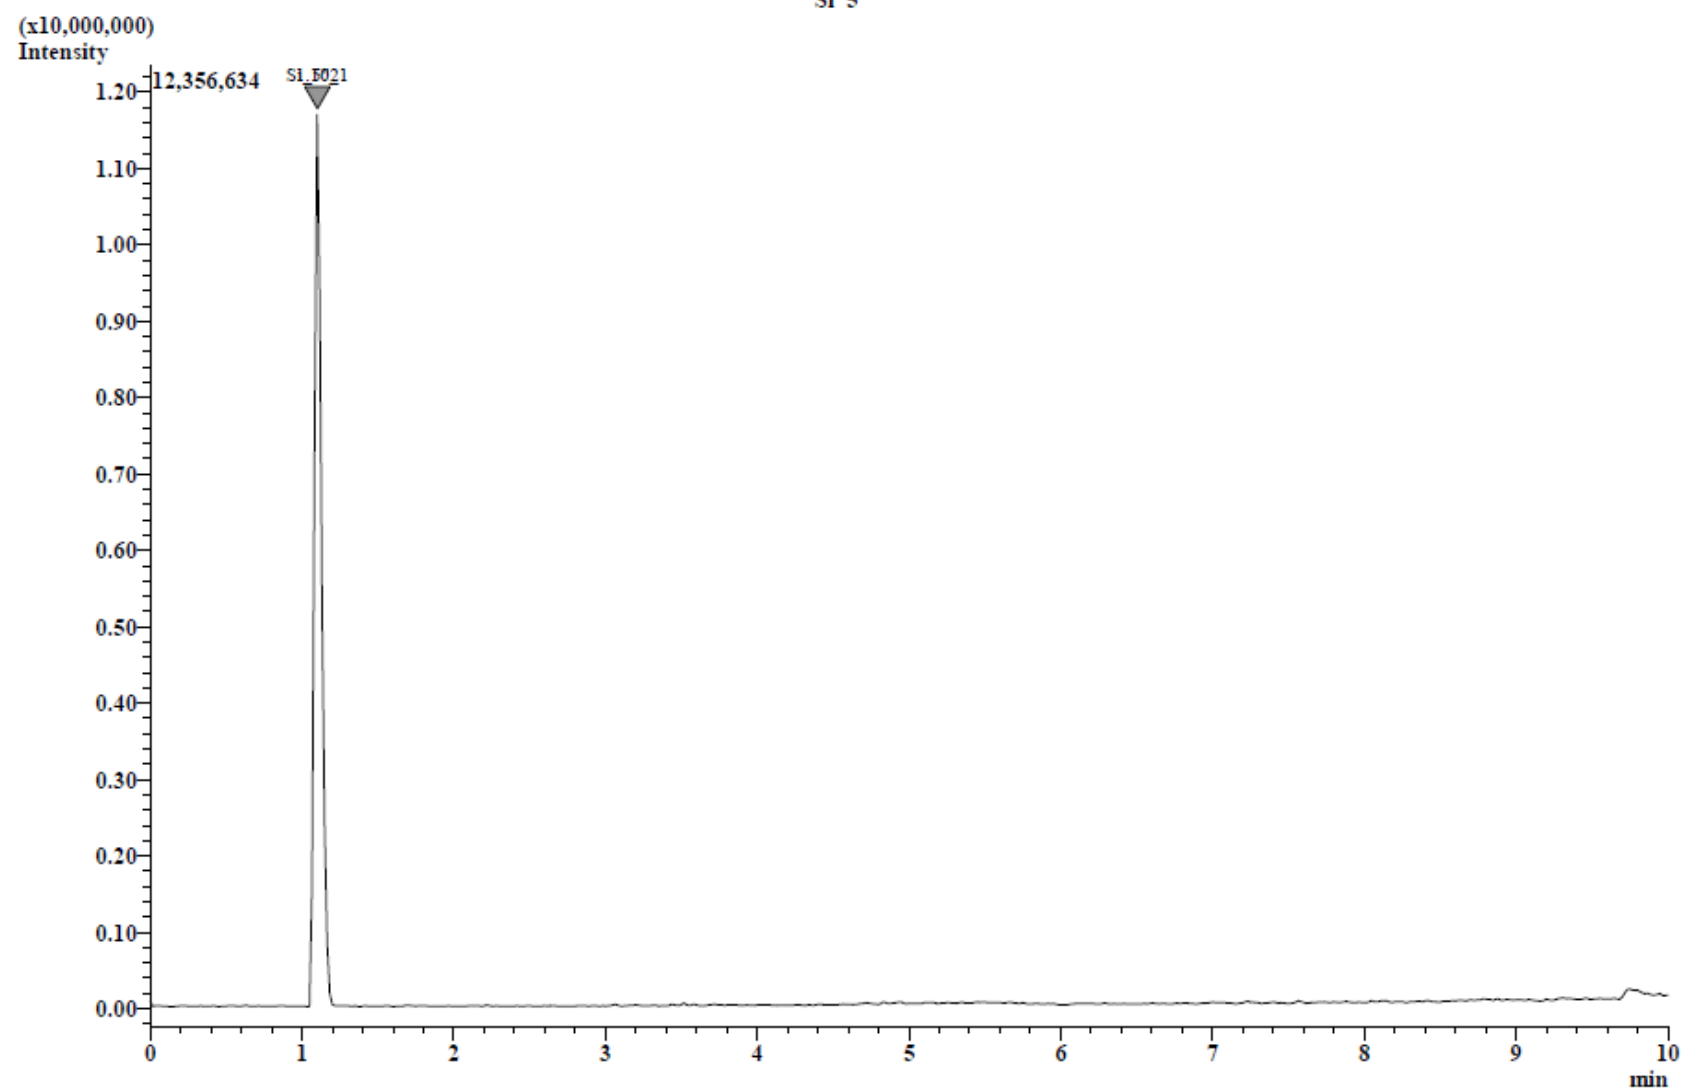

C:\LabSolutions\Data\Data\Peptidi\2020\11012020\Si5\_1.lcd

MS Spectrum

Peak#:1 R.Time:1.102

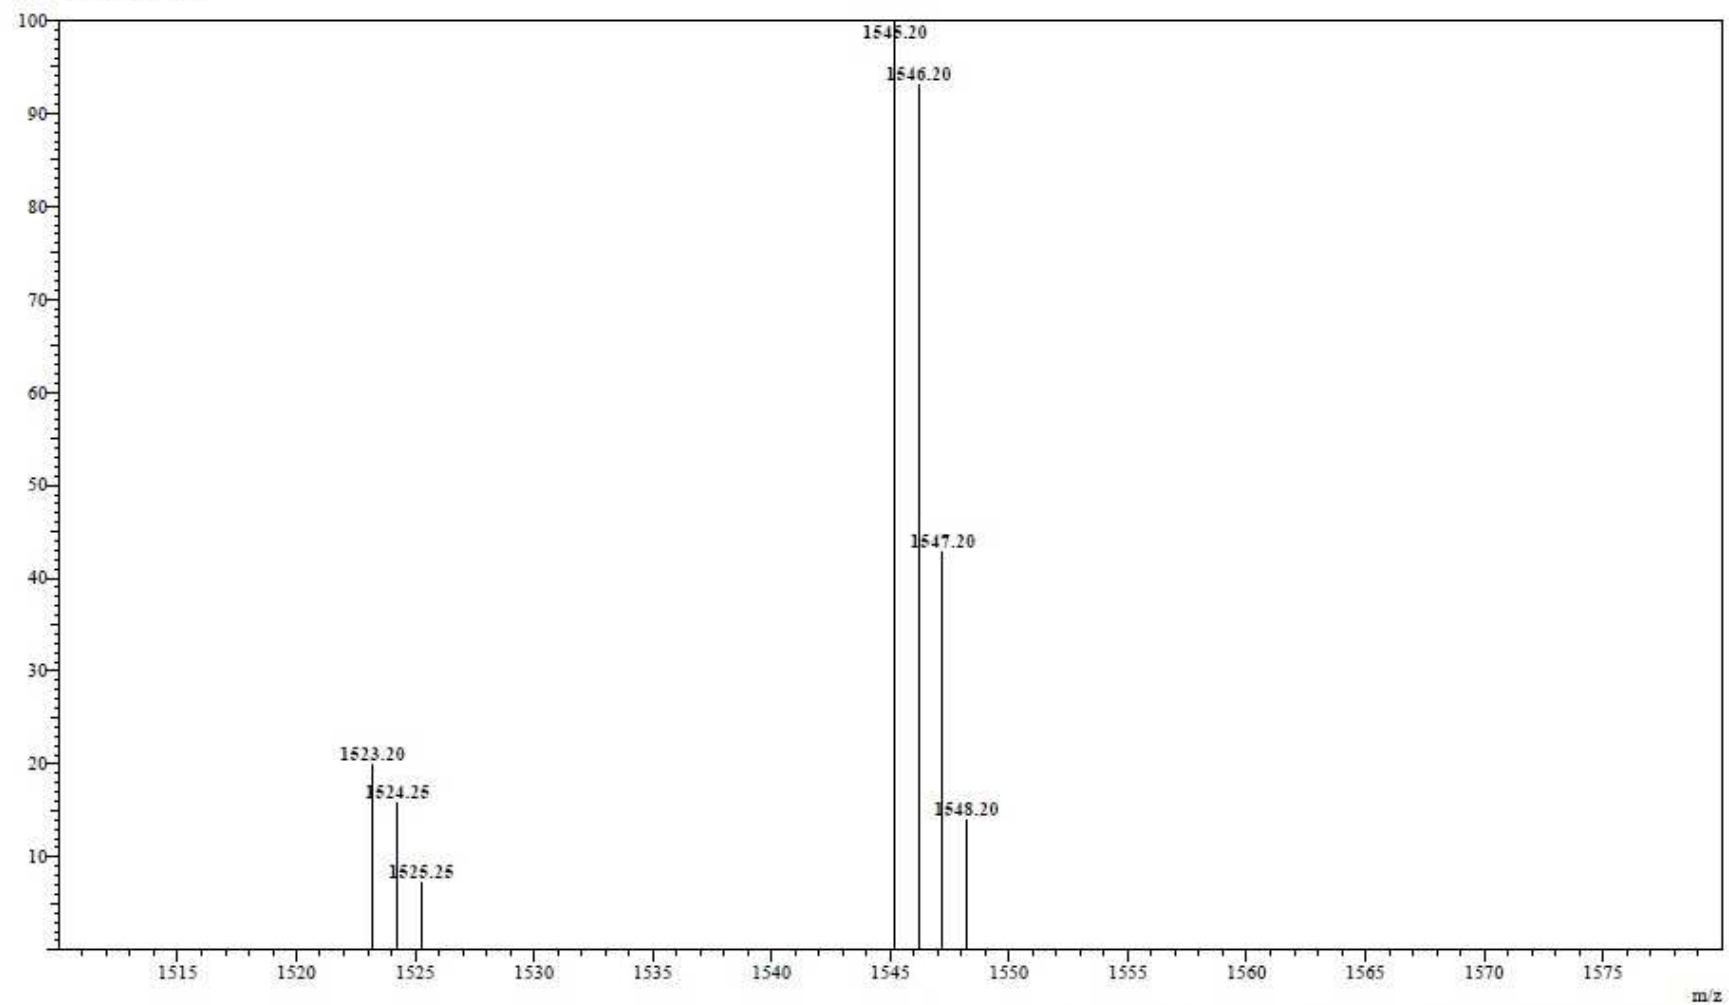

C:\LabSolutions\Data\Data\Peptidi\2020\11012020\Si5\_1.lcd

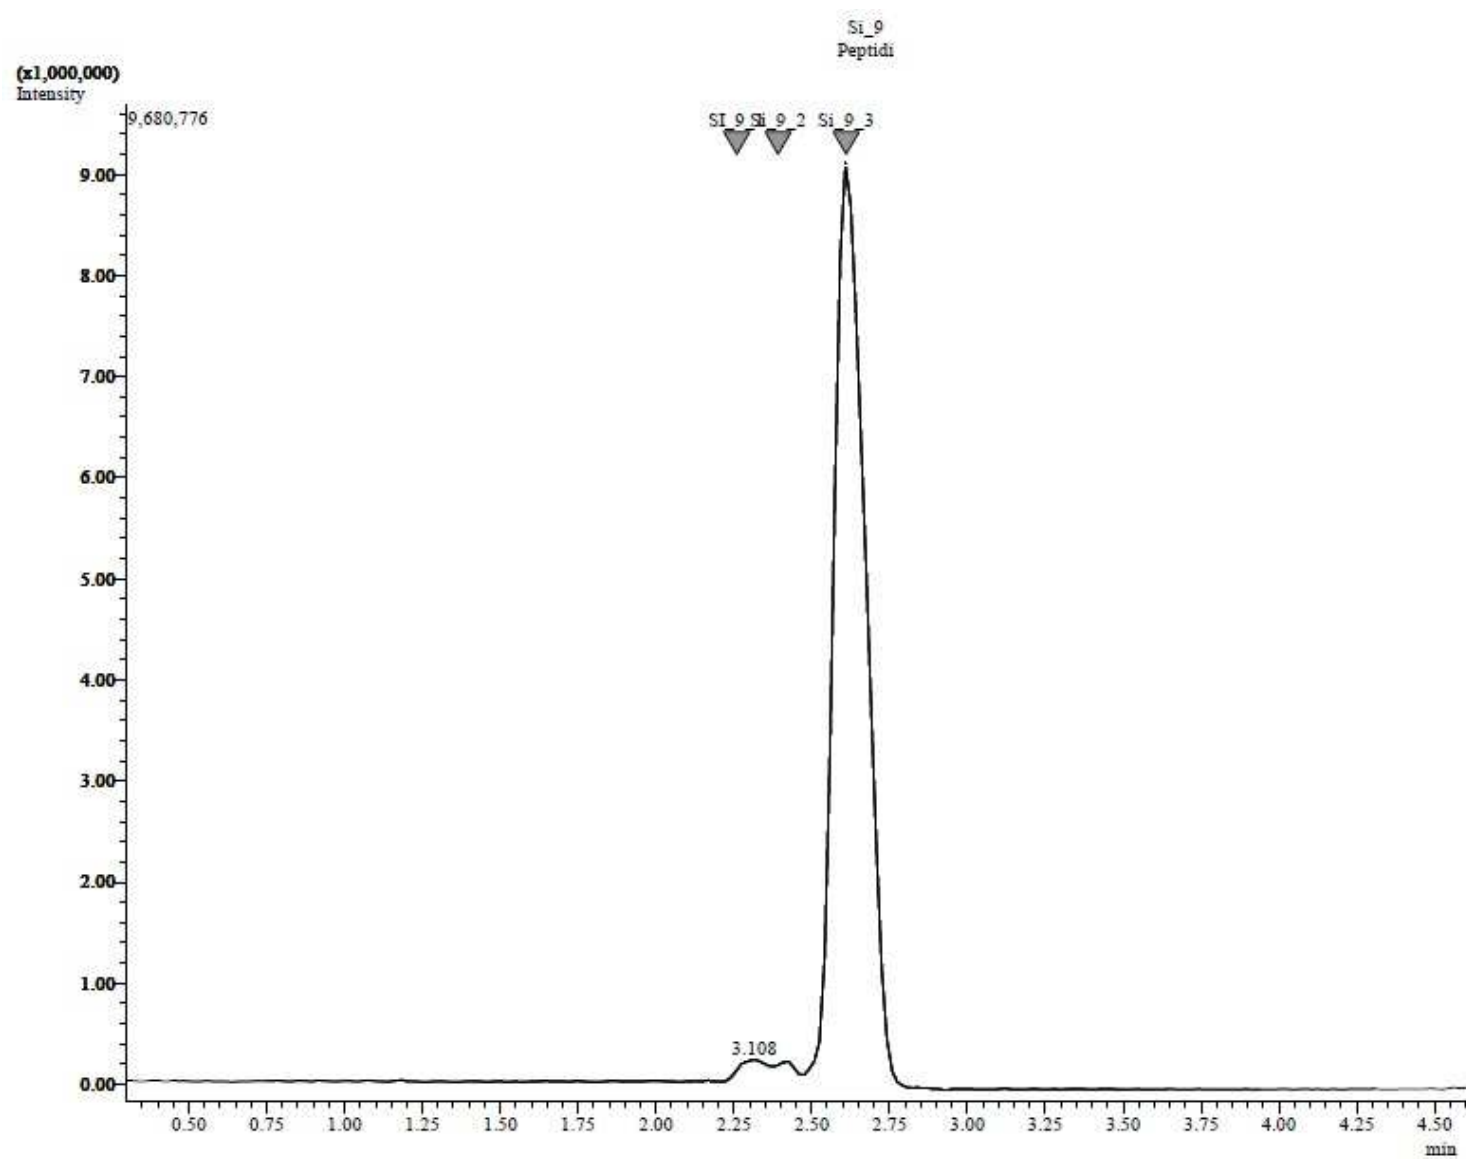

C:\LabSolutions\Data\Data\Peptidi\25102019\Si\_9\_1.lcd

Peak# 3 R.Time: 3.403

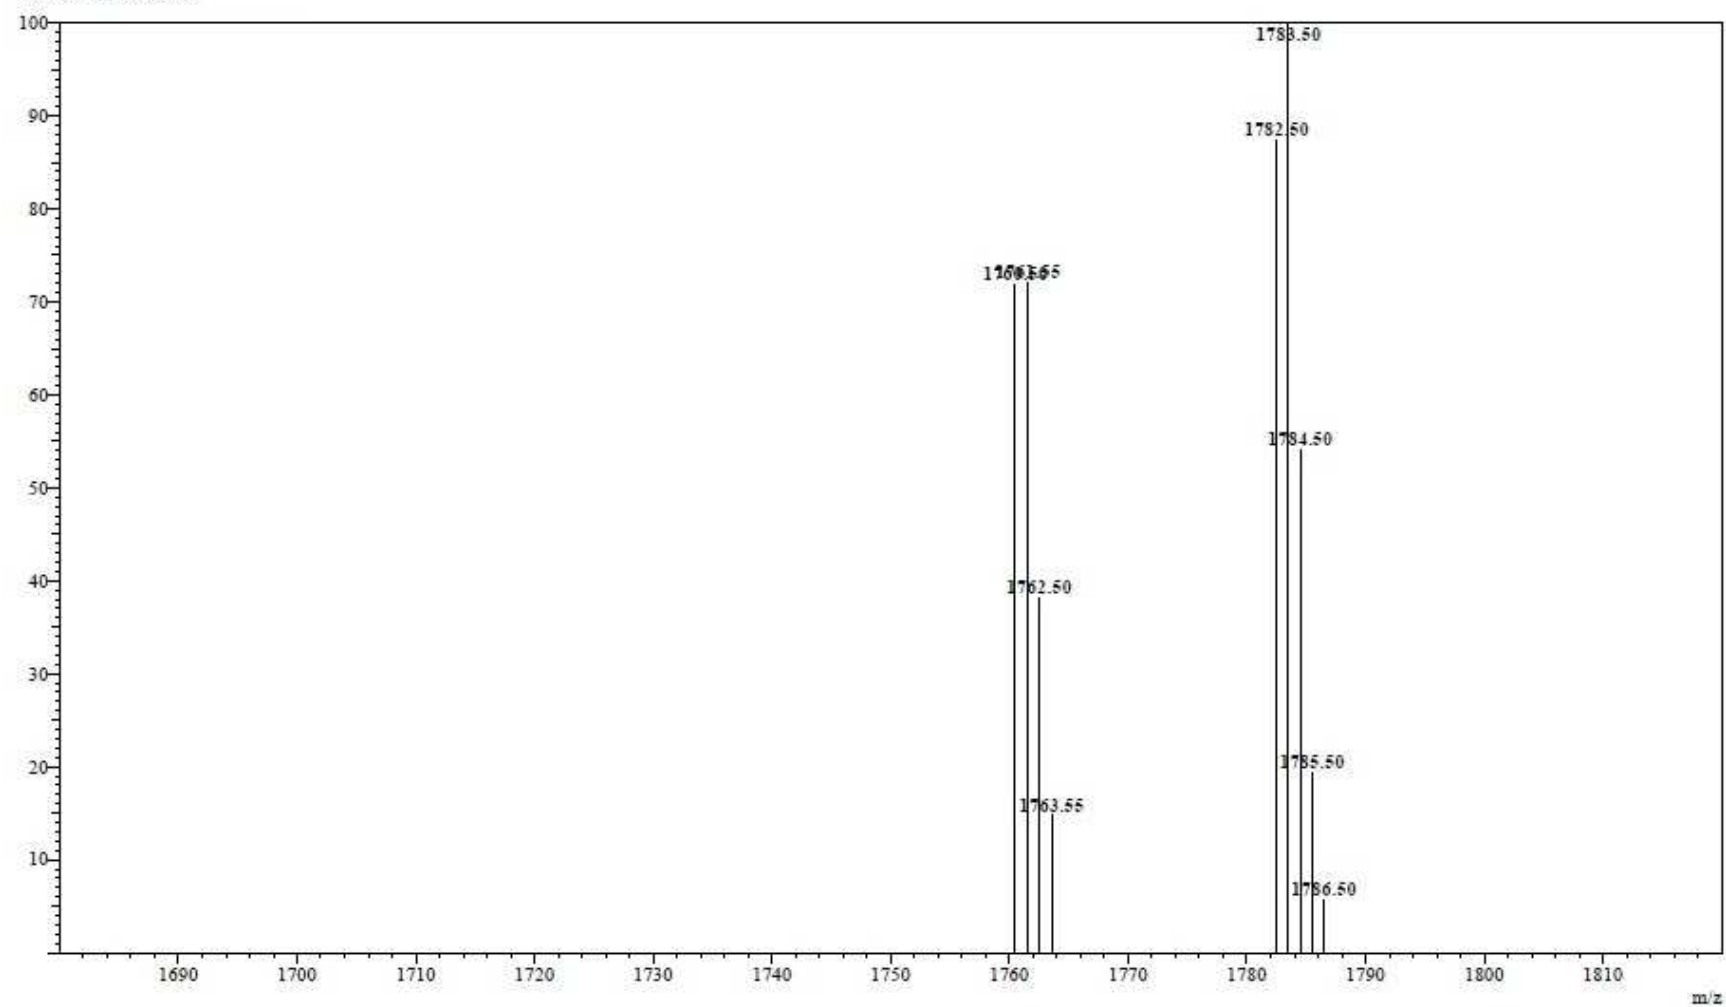

C:\LabSolutions\Data\Data\Peptidi\25102019\Si\_9\_1.lcd

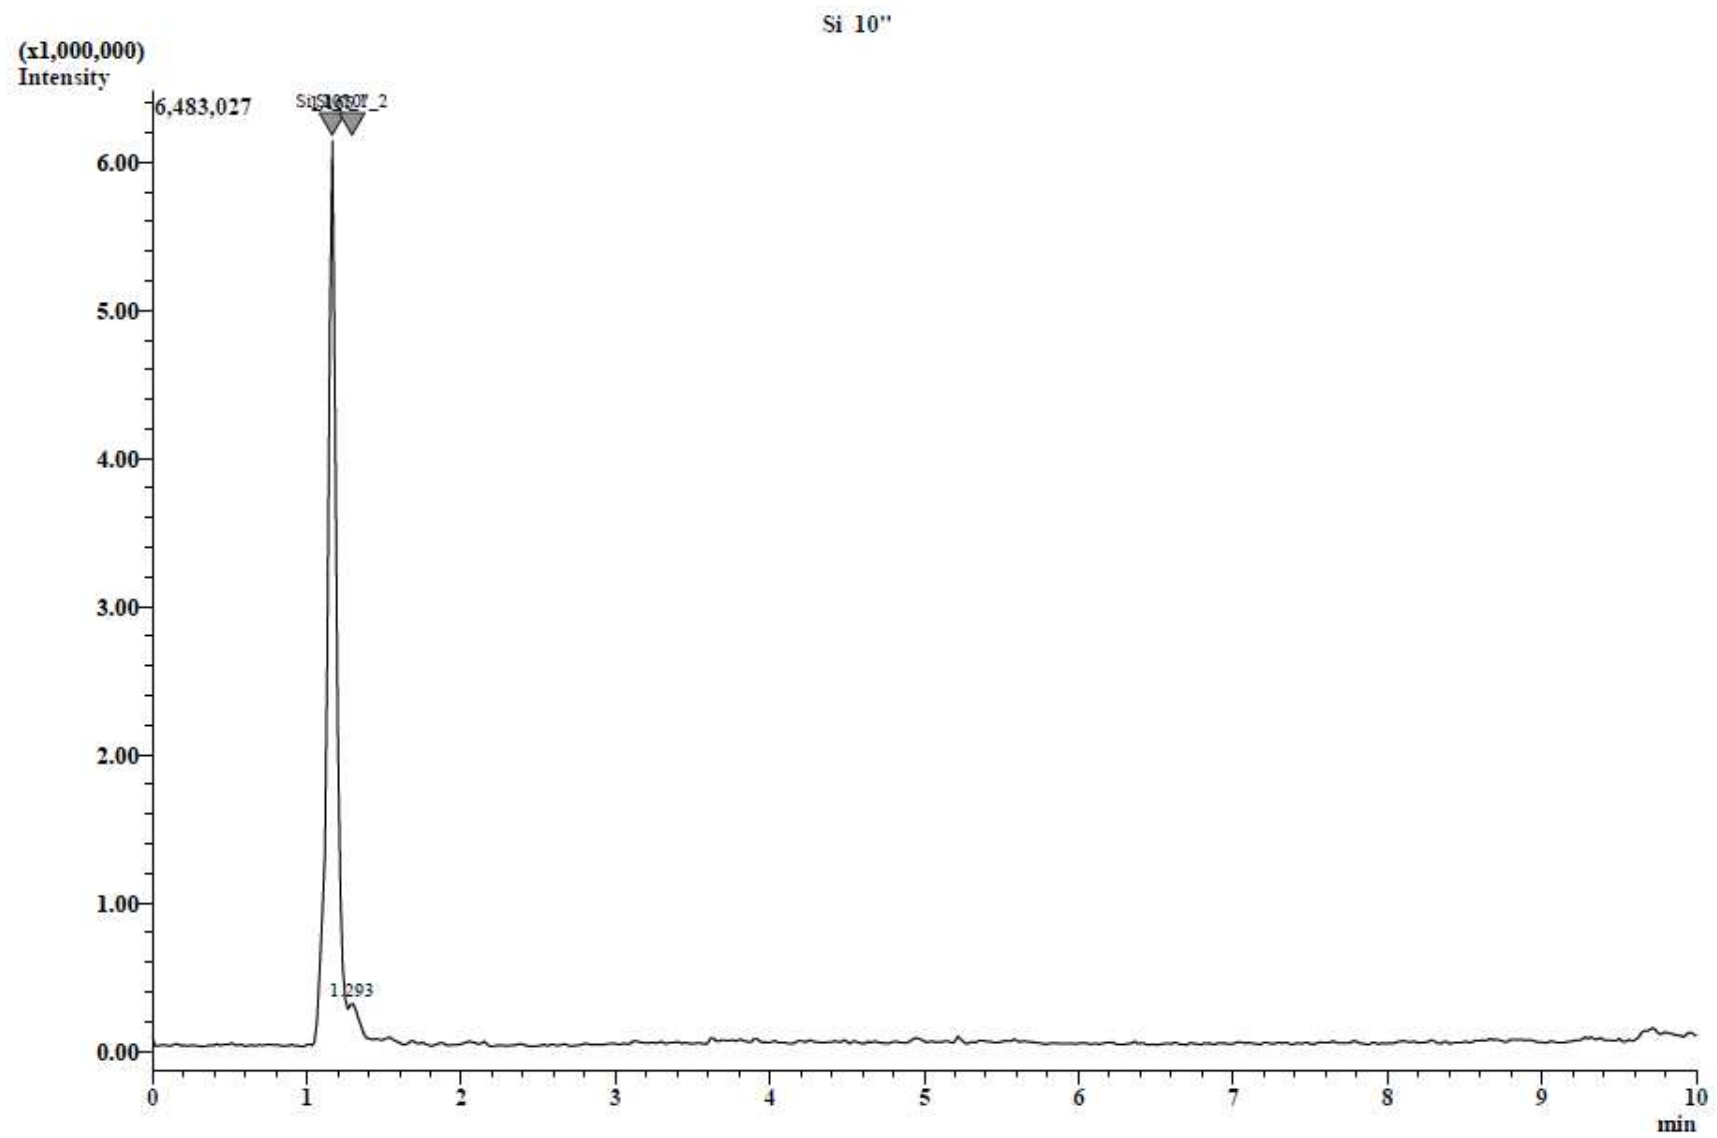

C:\LabSolutions\Data\Data\Peptidi\2020\11012020\Si\_10\_1".lcd



MS Spectrum

Peak#:1 R.Time:1.165

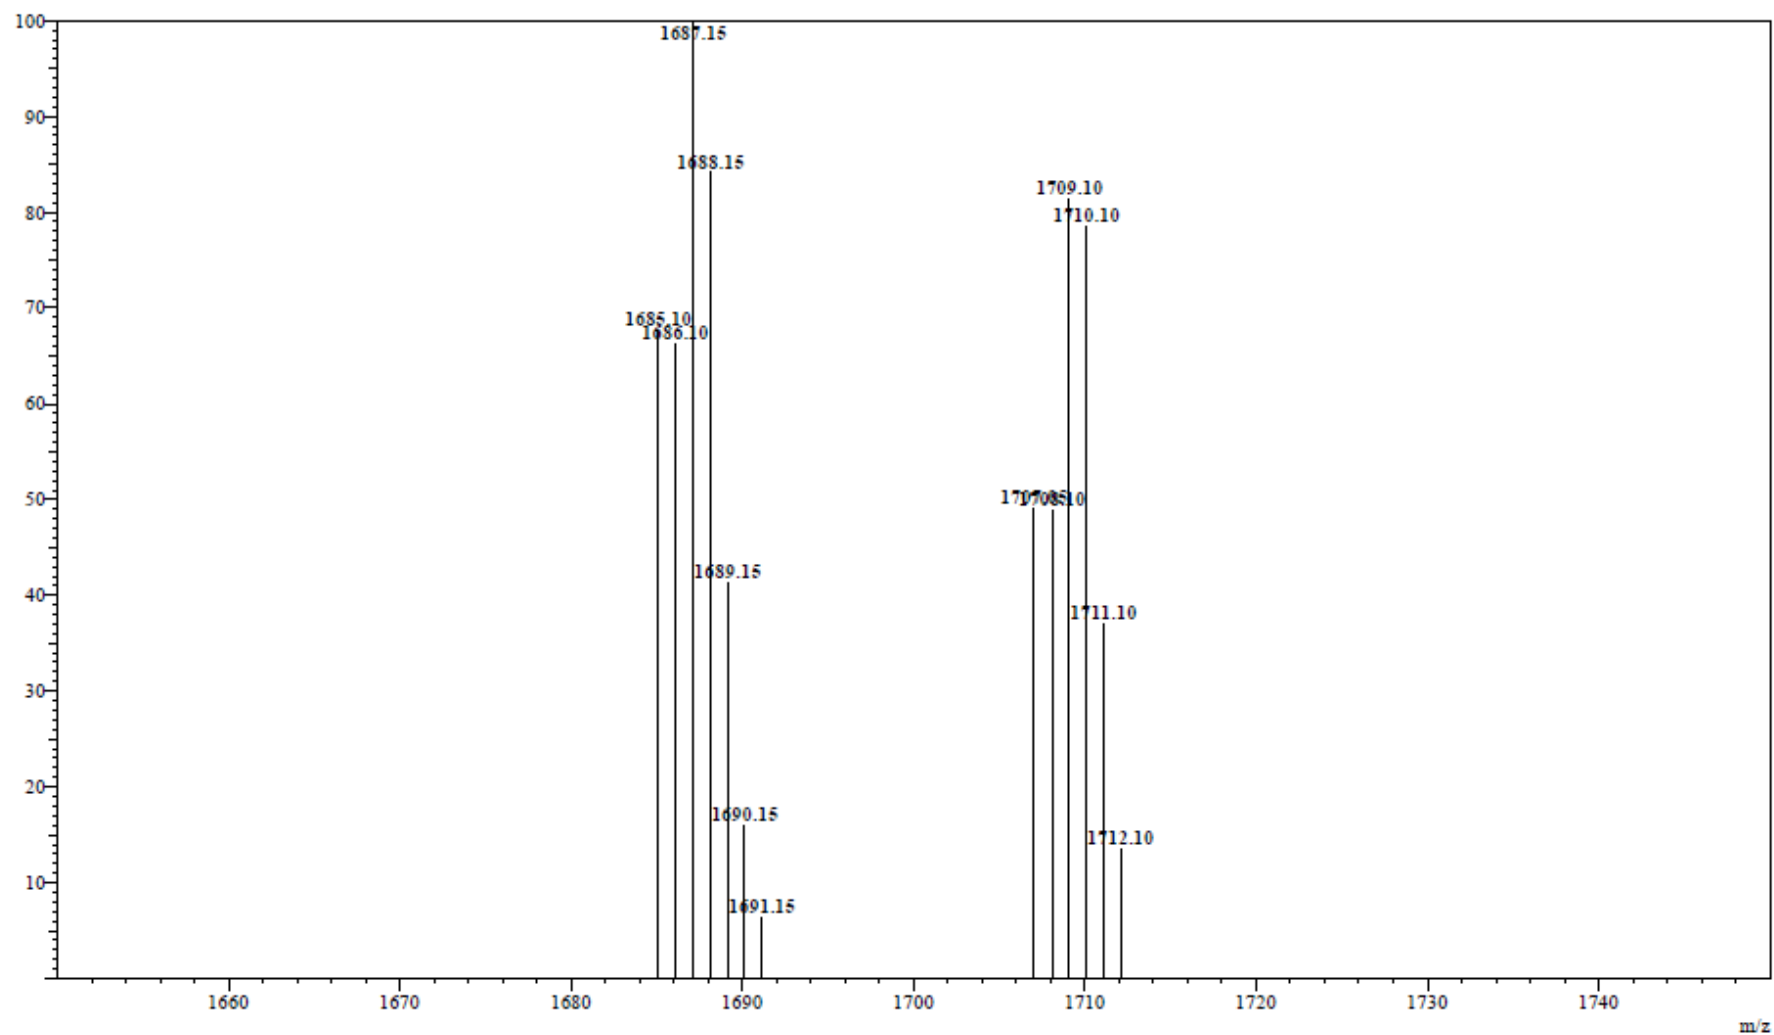

C:\LabSolutions\Data\Data\Peptidi\2020\11012020\Si\_10\_1".lcd

Si 12

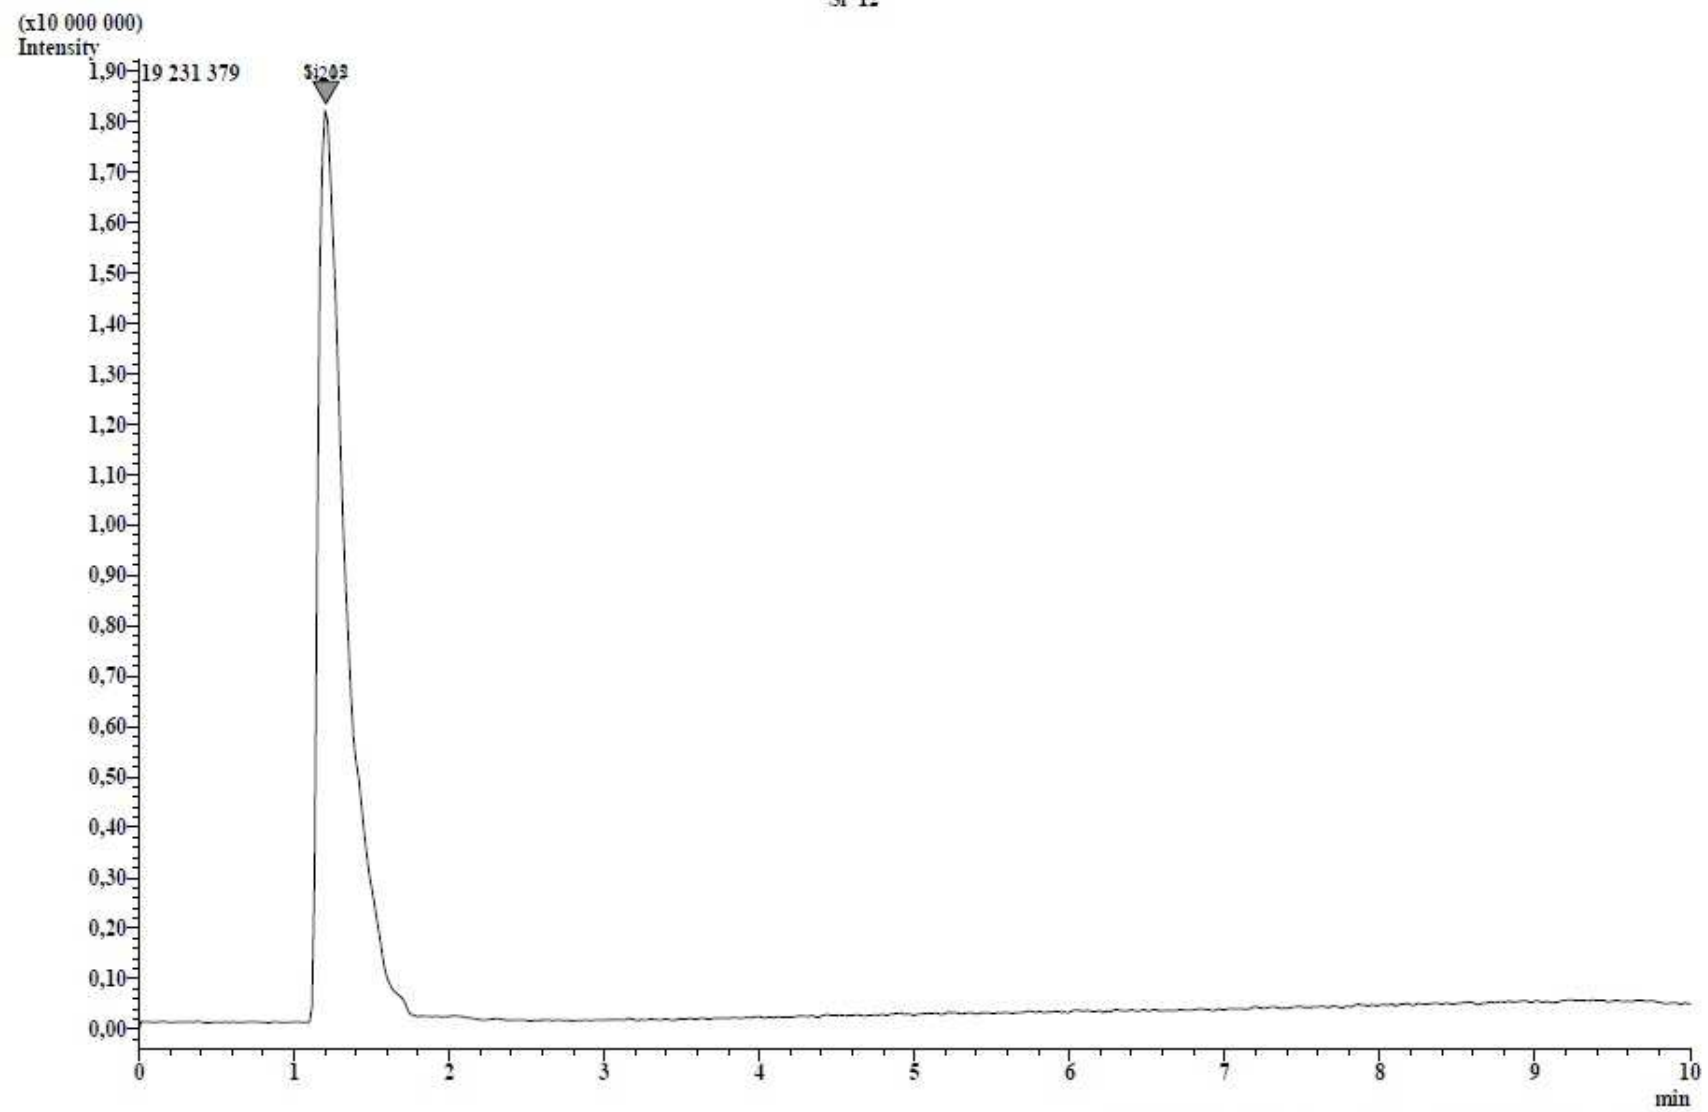

C:\LabSolutions\Data\Data\Peptidi\2392019\Si\_12\_1.lcd

MS Spectrum

Peak#:1 R.Time:1,205

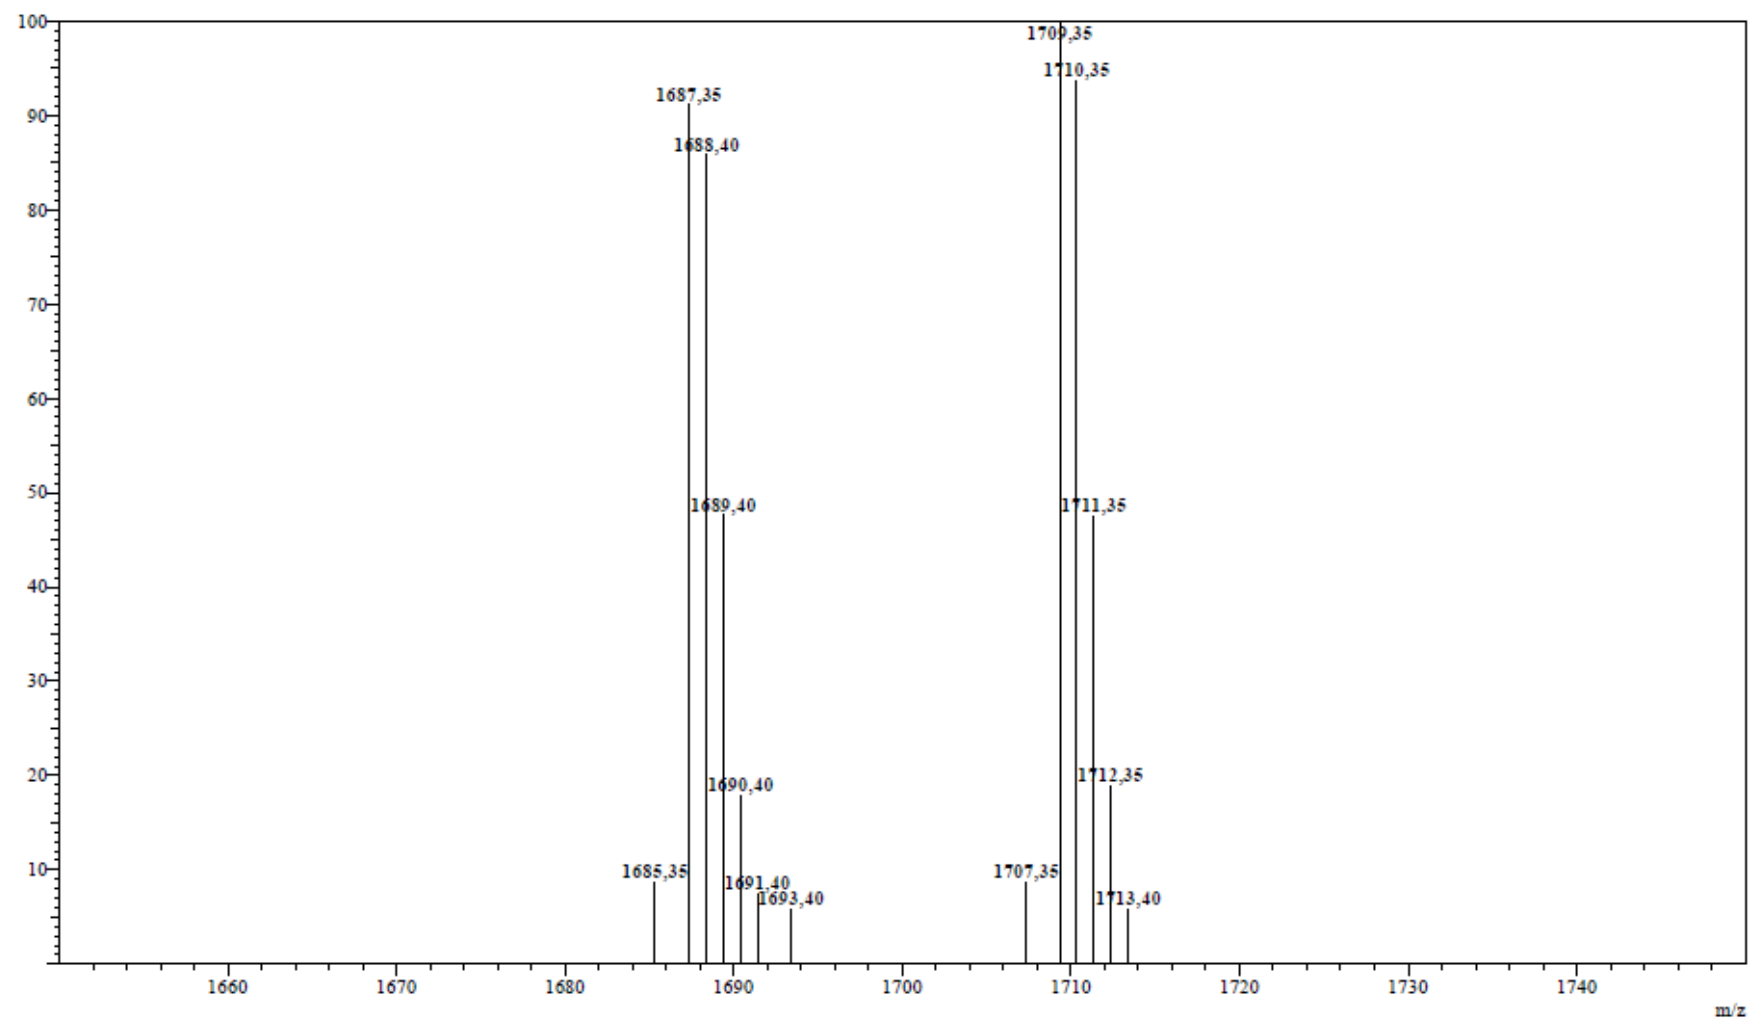

C:\LabSolutions\Data\Data\Peptidi\2392019\Si\_12\_1.lcd

# HPLC profiles of aimed compounds at different pH

*pH2*

Si4

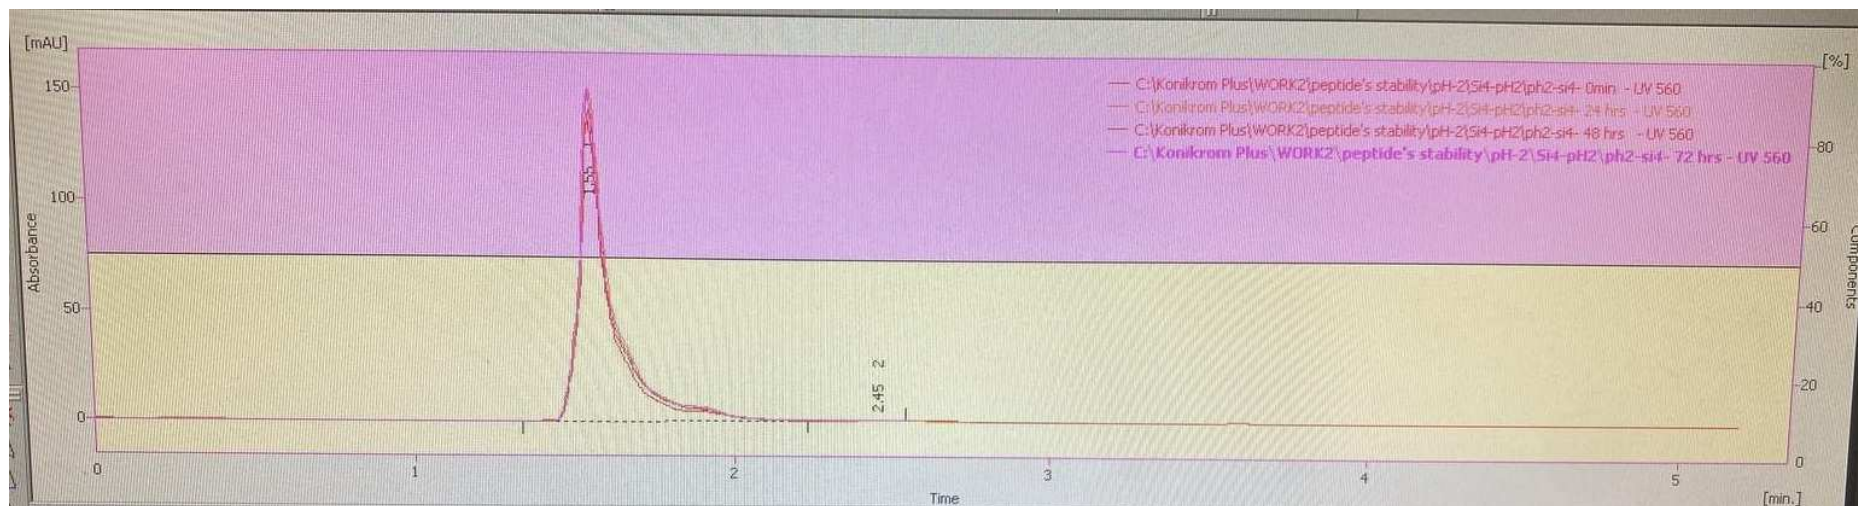

Si5

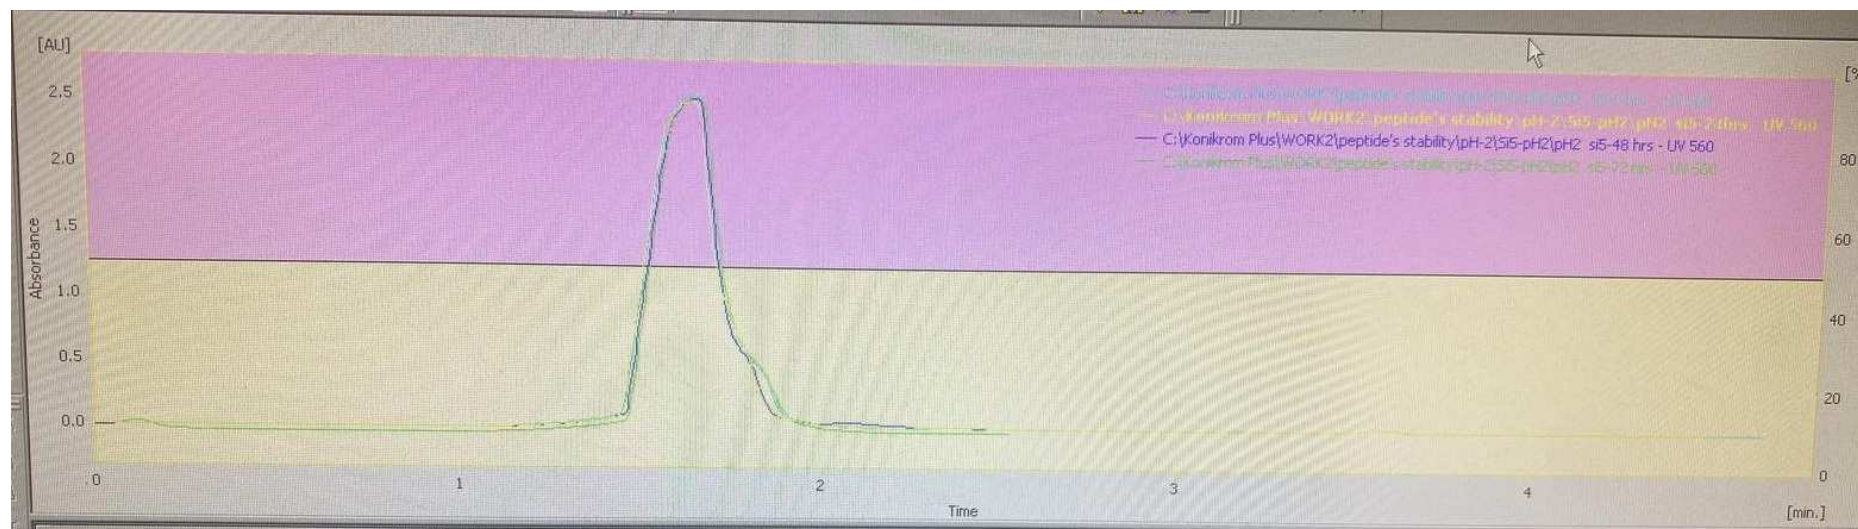



Si9

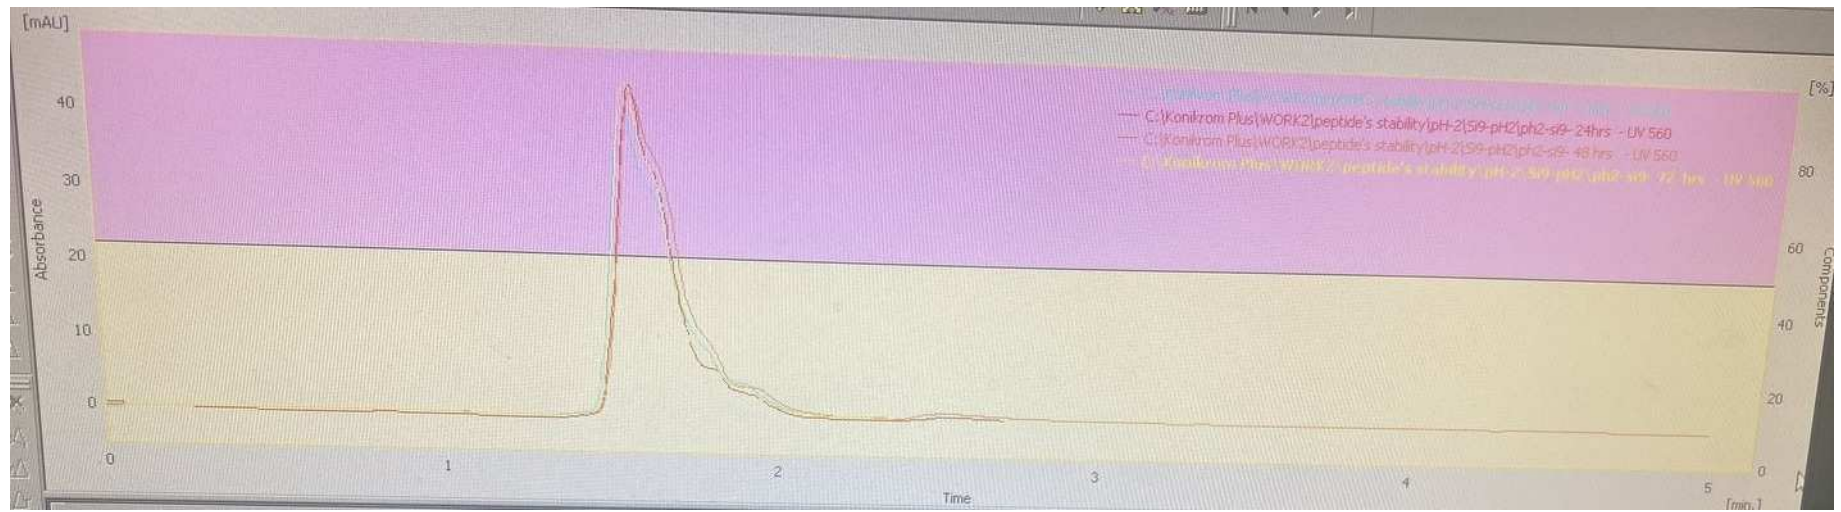

Si10

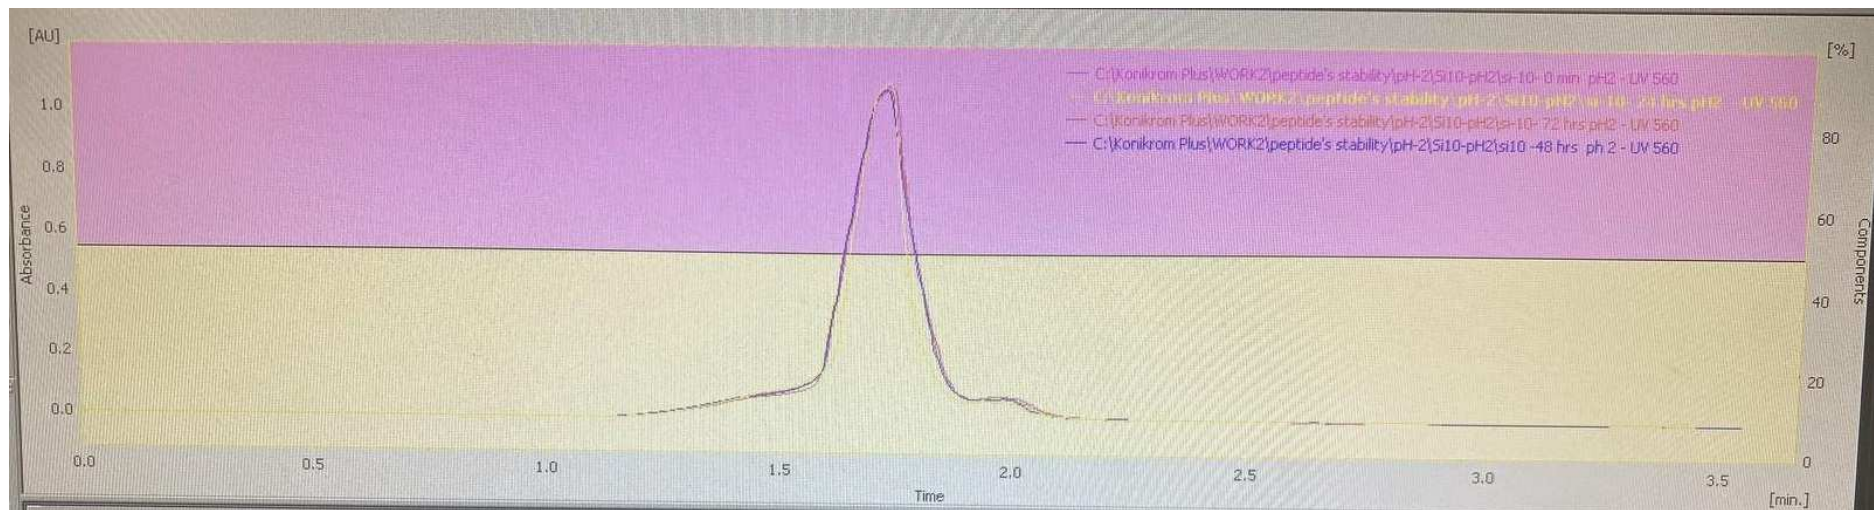

# Si12

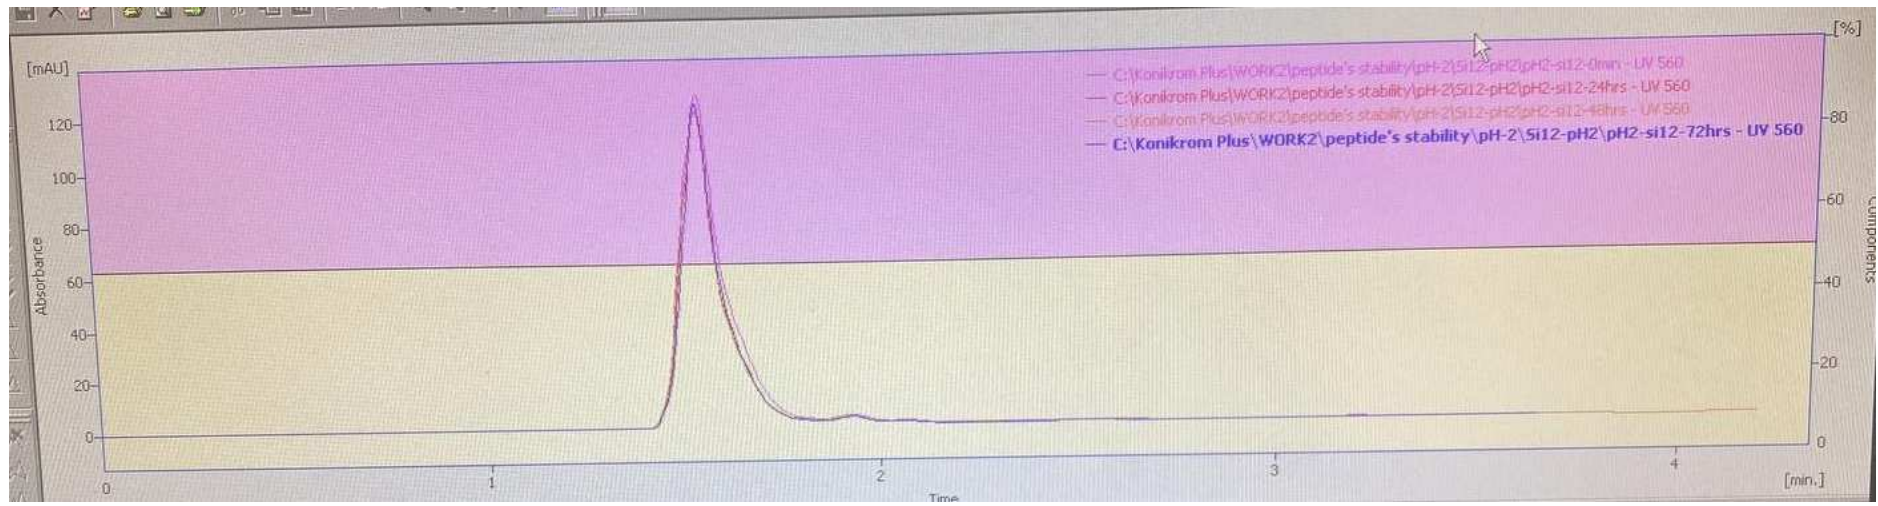



*pH7.4*

Si4

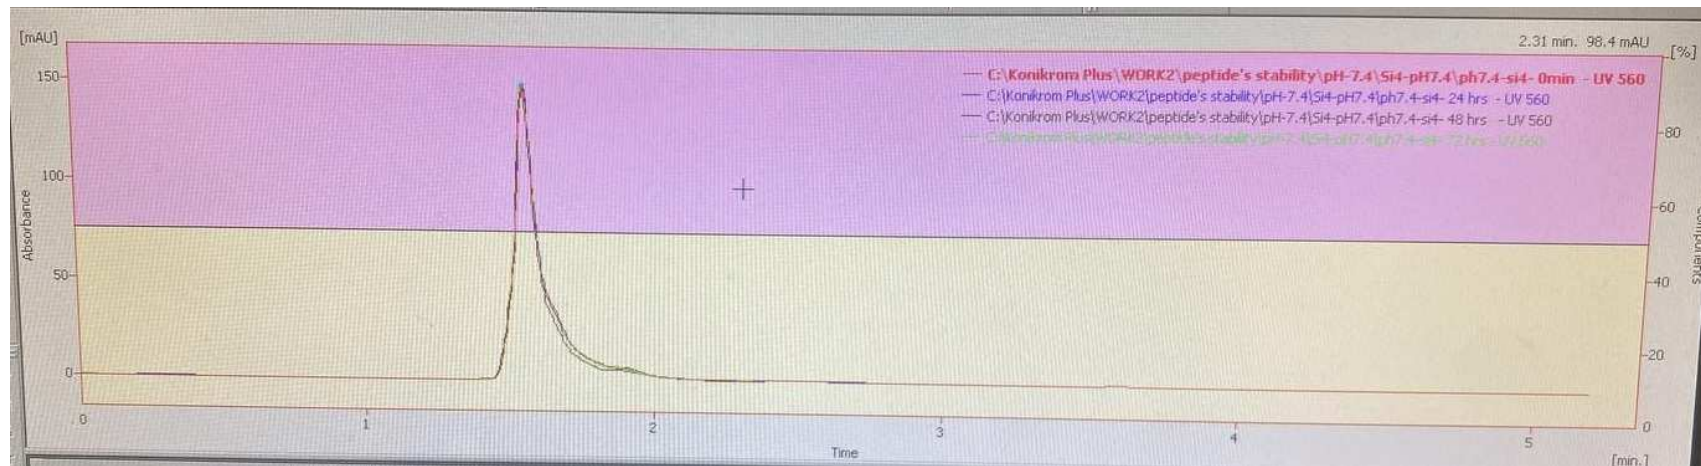

Si5

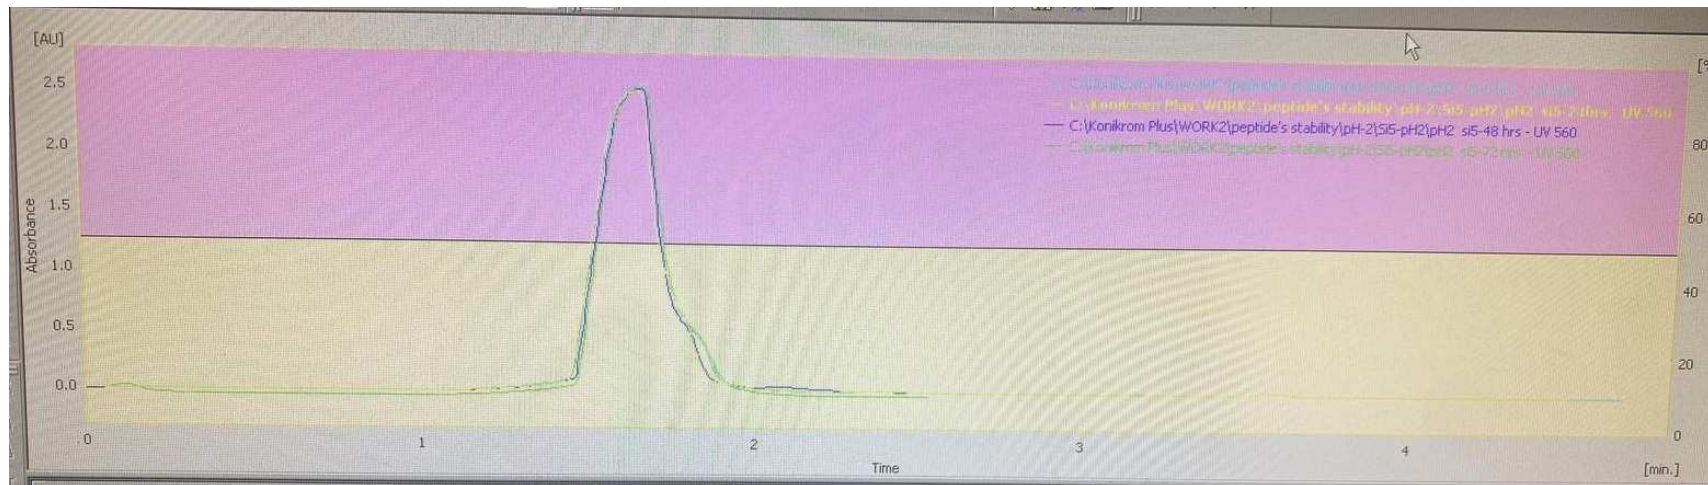

## Si9

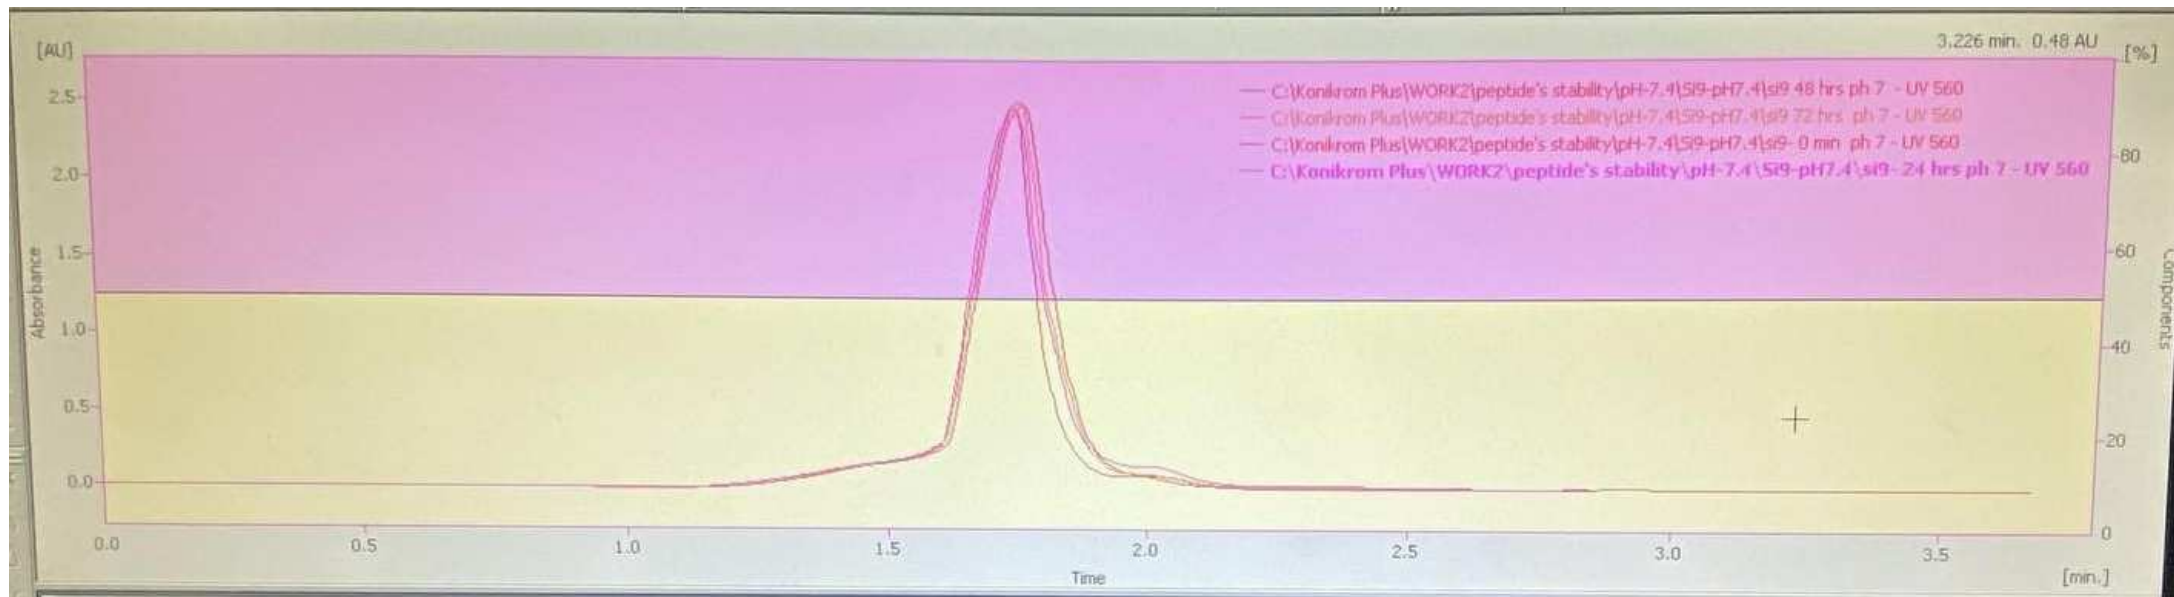

## Si10

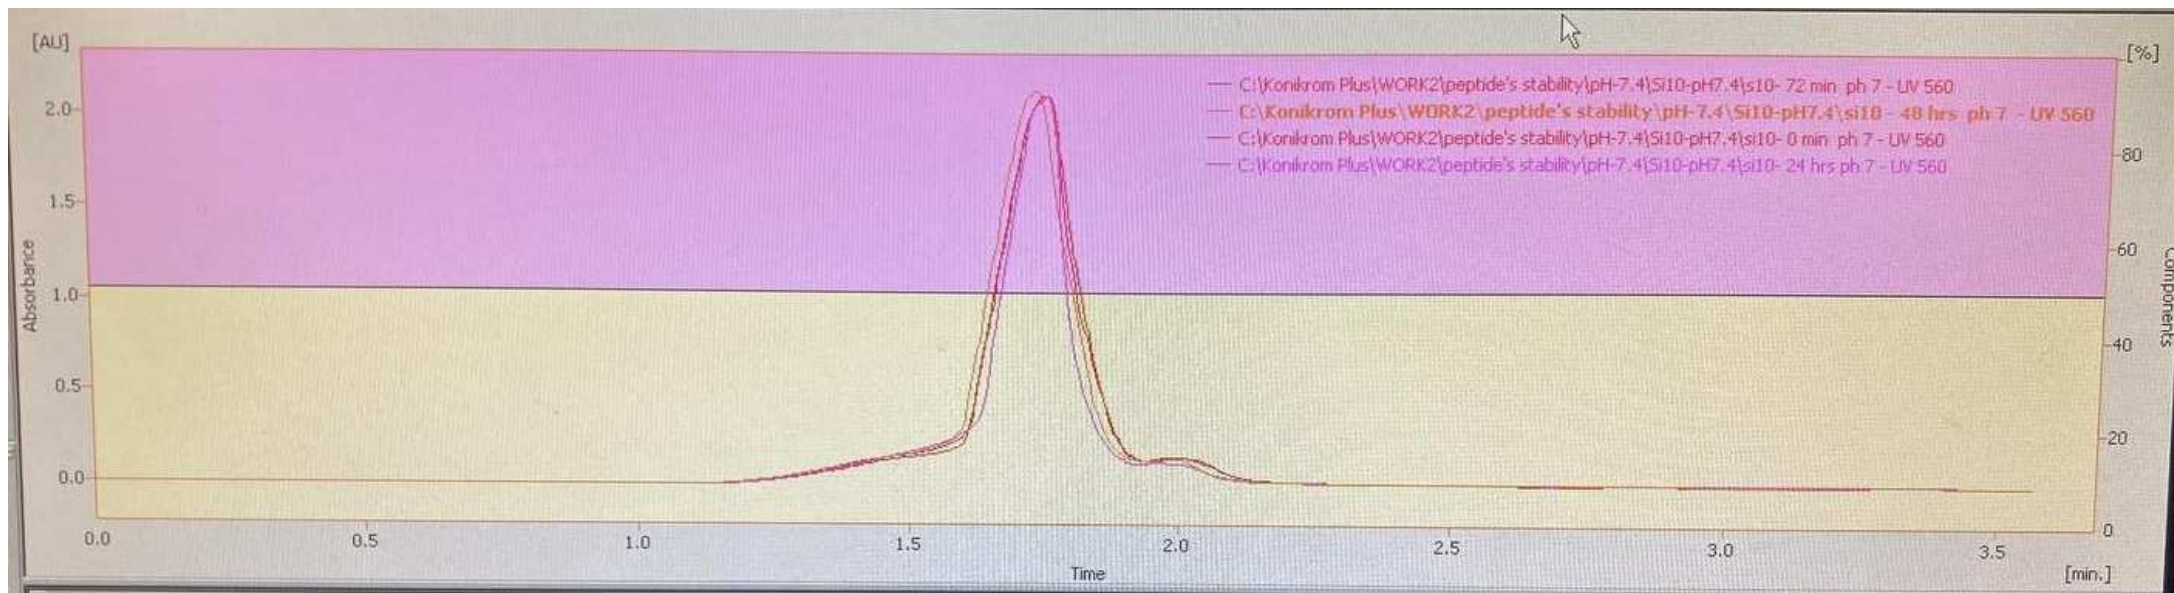



# Si12

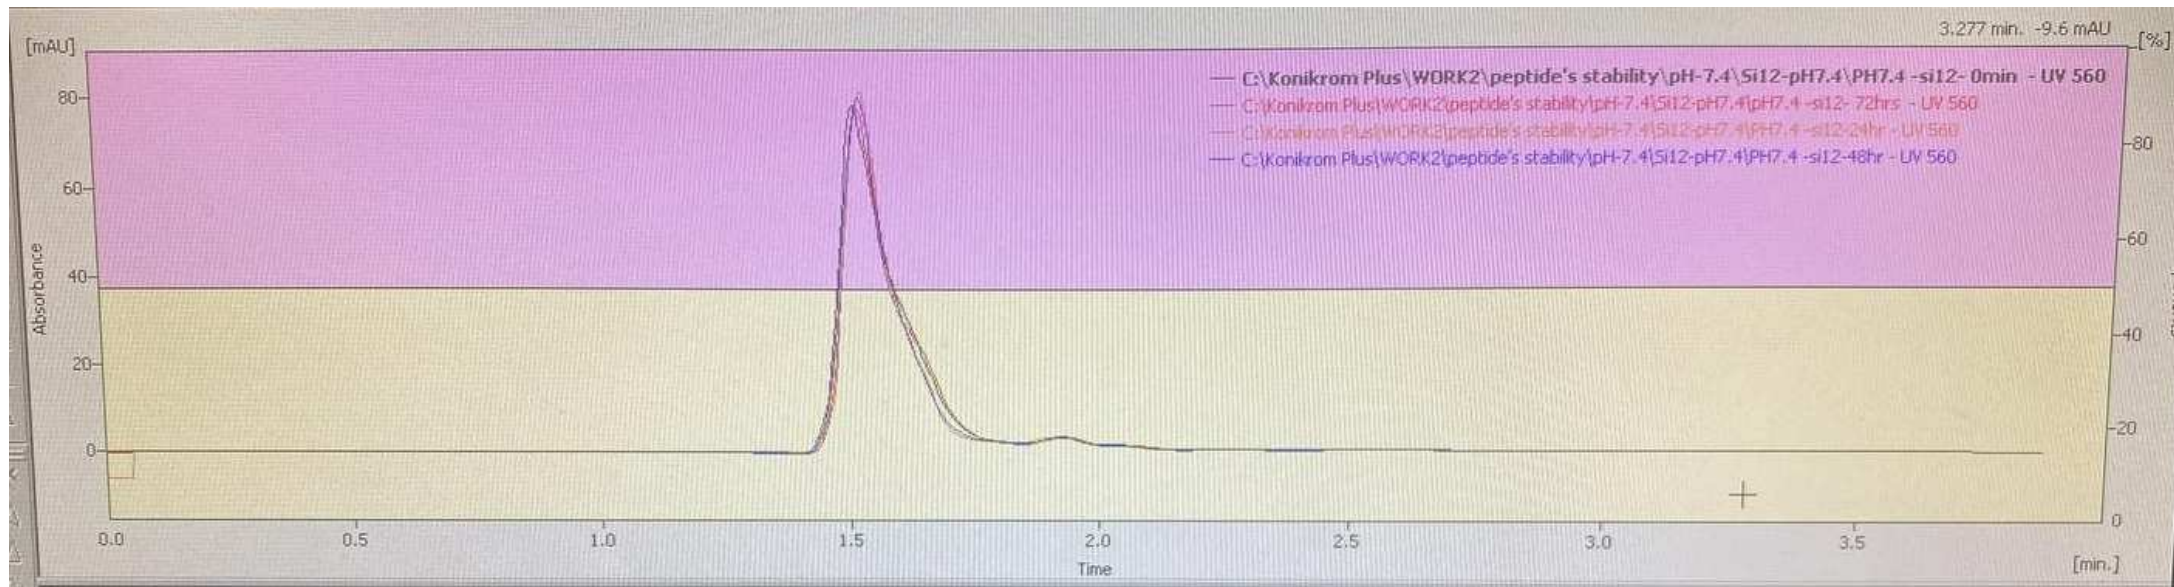



*pH9*

Si4

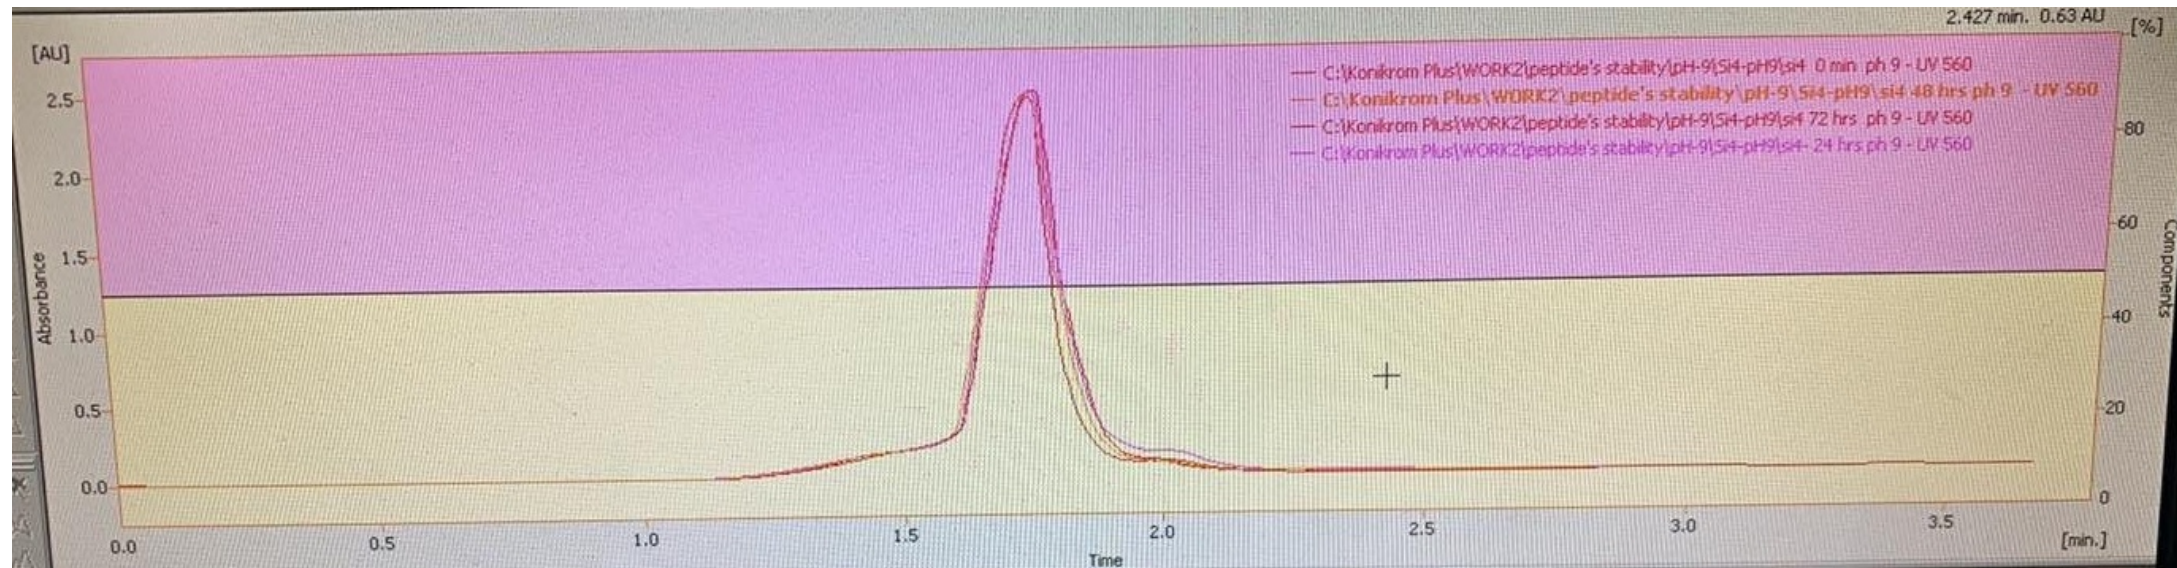

Si5

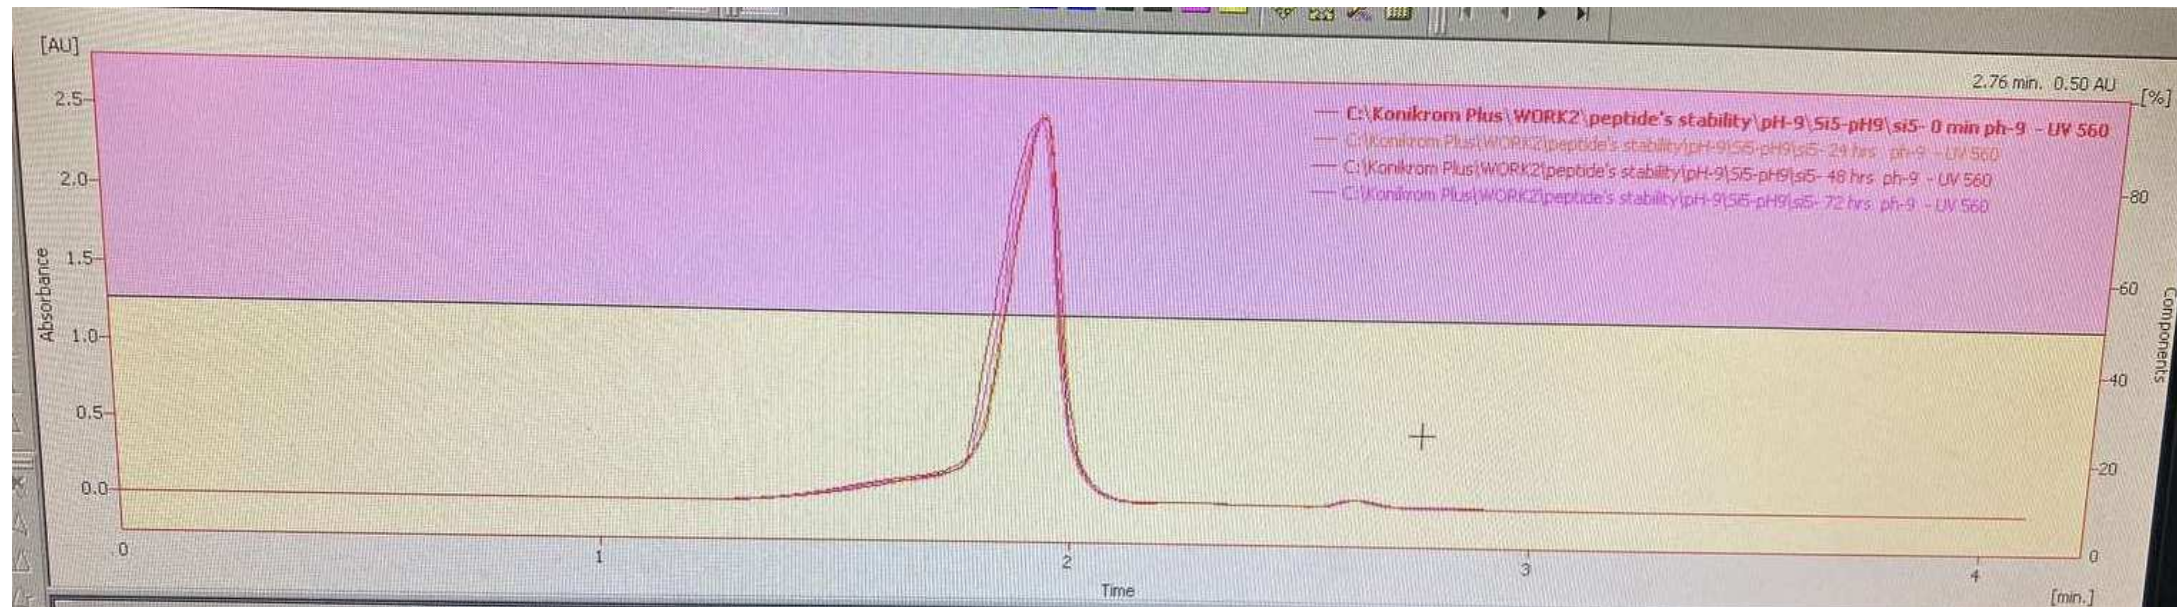



## Si9

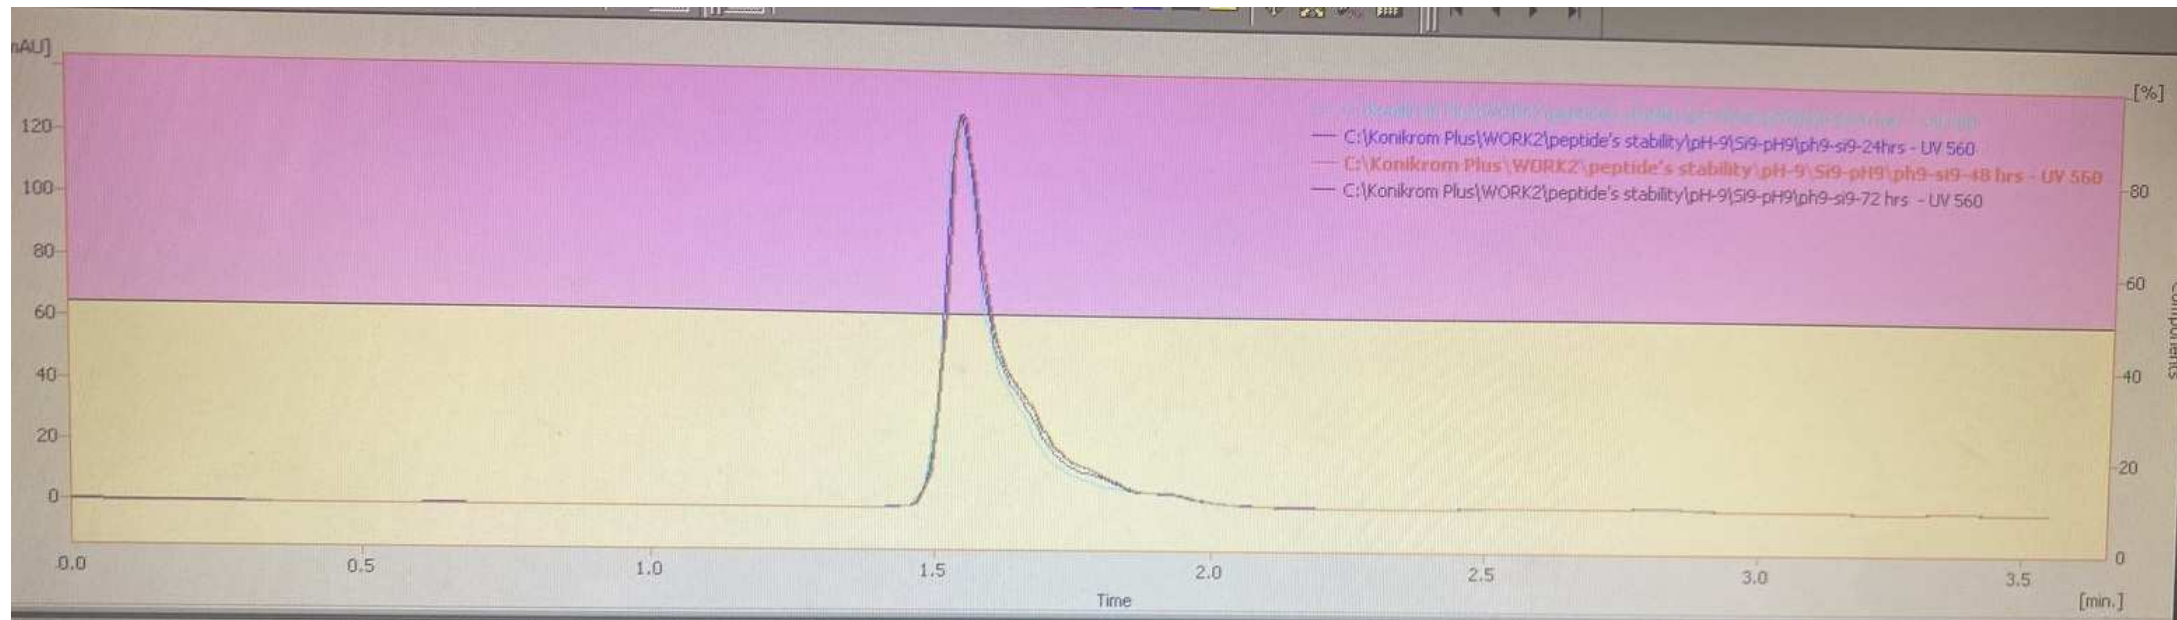

## Si10

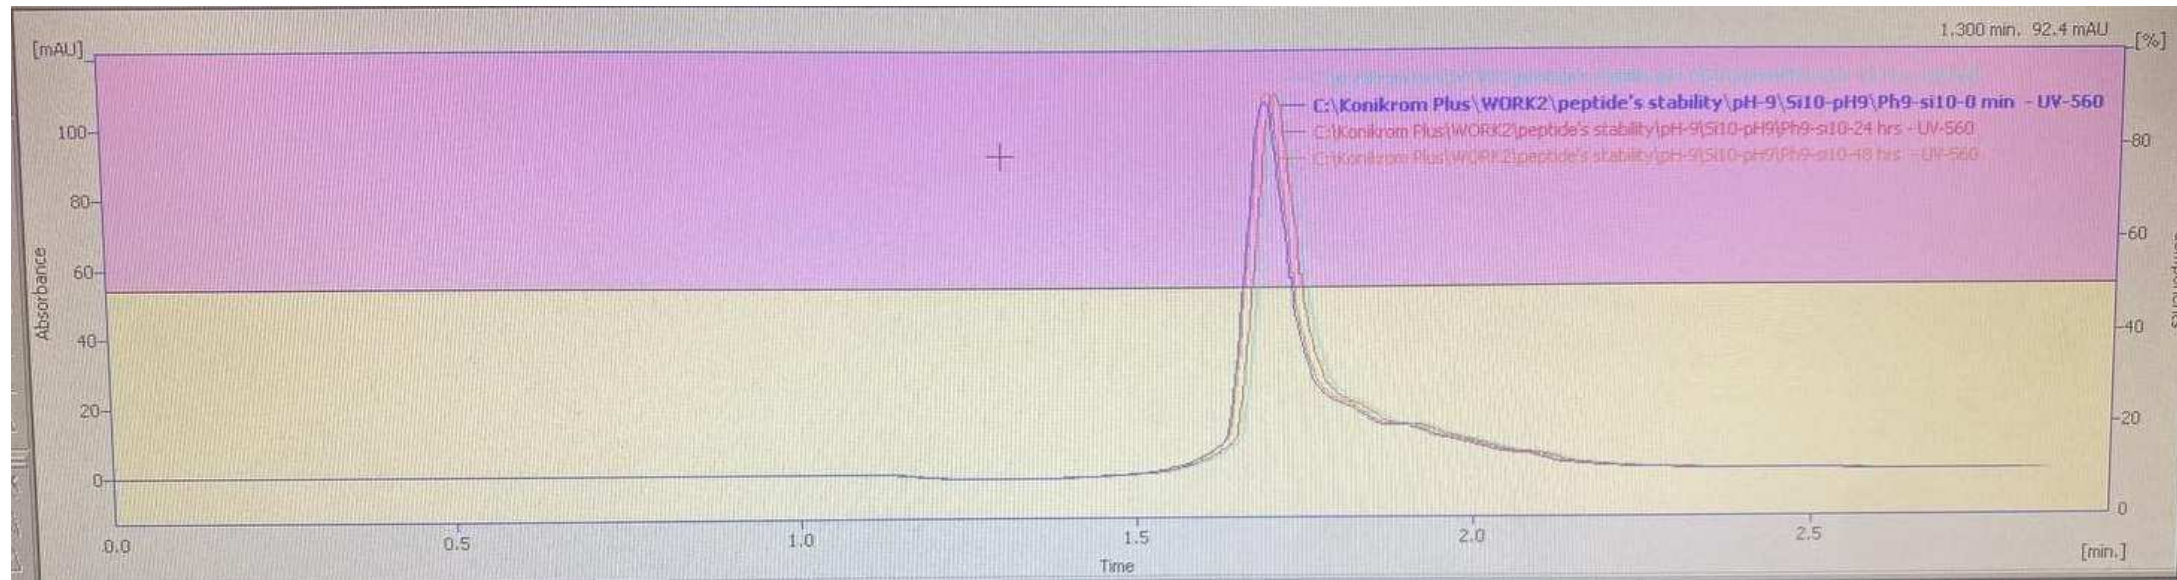

## Si12

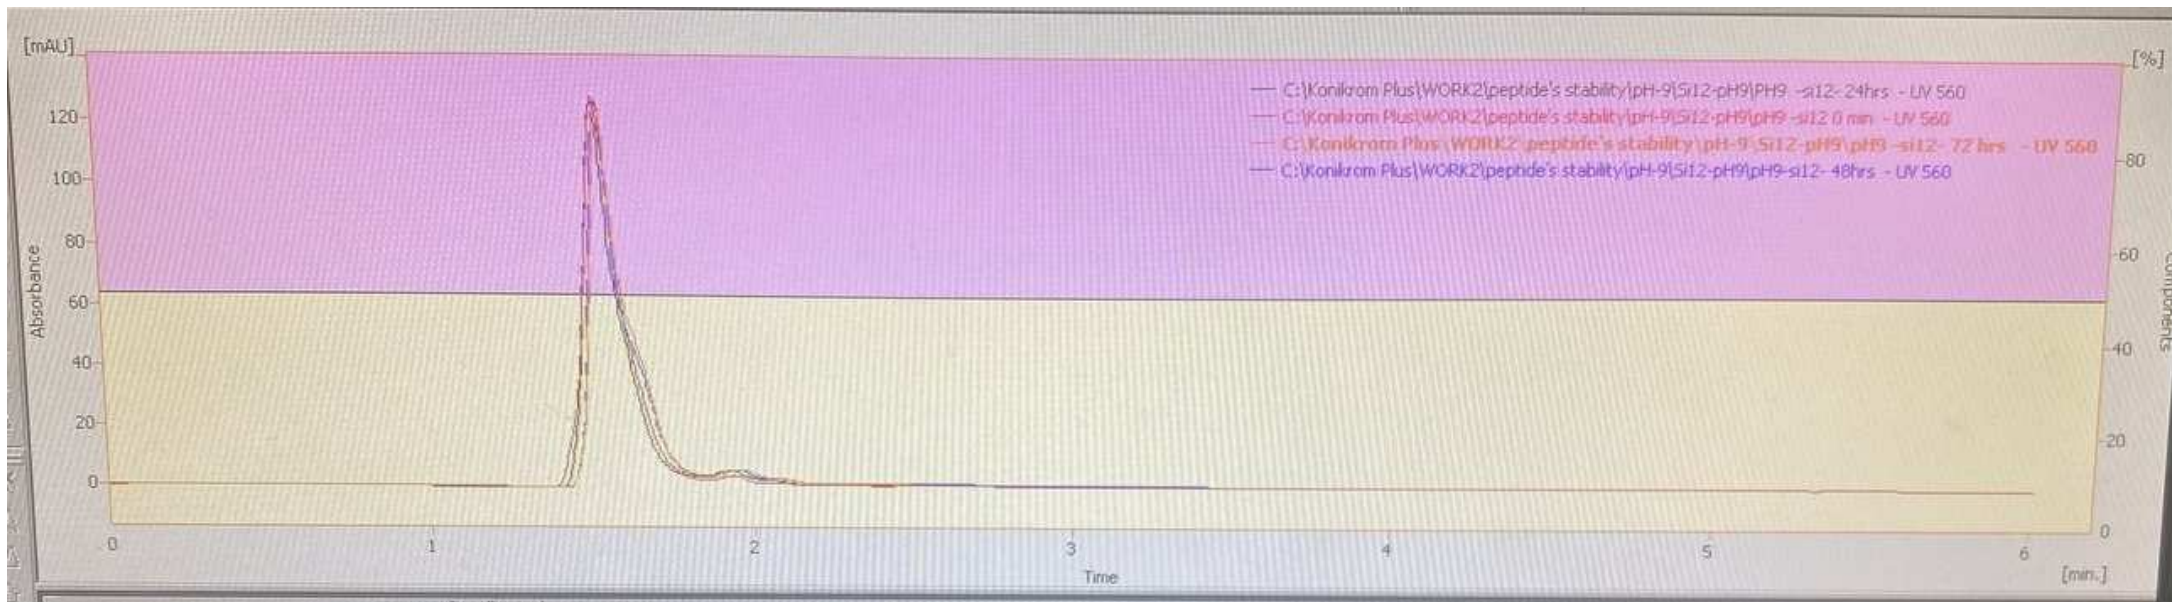

Supplement: s1 [file s1]
